# Supplementary material
Source: PubMed Central journal article supplement (PMC5328859)
Supplement: NIHMS842380-supplement-Supp_TableS1.pdf [file NIHMS842380-supplement-Supp_TableS1.pdf]

## SUPPLEMENTAL TABLE S1

## Gene Cluster

| from Fig. 5                                                          | GO: Biological Process                         | GO: Cellular Component/Domain/Dip-value                                        | Genes in cluster |    |
|----------------------------------------------------------------------|------------------------------------------------|--------------------------------------------------------------------------------|------------------|----|
| 1                                                                    | neuron differentiation                         | 2.76E-05                                                                       | 46               |    |
|                                                                      | cell adhesion                                  | 2.76E-05                                                                       | 38               |    |
|                                                                      | transmission of nerve impulse                  | 4.58E-03                                                                       | 32               |    |
|                                                                      | neuron projection development                  | 4.70E-03                                                                       | 32               |    |
|                                                                      | regulation of membrane potential               | 8.65E-03                                                                       | 16               |    |
|                                                                      | neuron projection                              | 3.92E-08                                                                       | 39               |    |
|                                                                      | synapse                                        | 1.11E-07                                                                       | 31               |    |
|                                                                      | 2                                              | interphase of mitotic cell cycle                                               | 3.80E-10         | 38 |
|                                                                      |                                                | histone H3-K9 methylation                                                      | 4.02E-10         | 16 |
|                                                                      |                                                | DNA replication initiation                                                     | 1.11E-09         | 14 |
|                                                                      |                                                | G1/S transition of mitotic cell cycle                                          | 3.35E-09         | 24 |
|                                                                      |                                                |                                                                                | 1.39E-07         | 13 |
| 3                                                                    | regionalization                                | 4.59E-04                                                                       | 33               |    |
|                                                                      | anterior/posterior pattern specification       | 3.29E-16                                                                       | 21               |    |
|                                                                      | neuron differentiation                         | 8.38E-11                                                                       | 14               |    |
|                                                                      |                                                | 2.41E-05                                                                       | 16               |    |
|                                                                      |                                                | 1.33E-26                                                                       | 31               |    |
| 4                                                                    | calmodulin binding                             | 5.04E-04                                                                       | 16               |    |
|                                                                      | regulation of vesicle-mediated transport       | 5.28E-04                                                                       | 20               |    |
|                                                                      | neuron projection development                  | 7.16E-04                                                                       | 39               |    |
|                                                                      | synapse                                        | 2.90E-05                                                                       | 32               |    |
|                                                                      | Genes involved in NCAM signaling for neurite o | 3.74E-04                                                                       | 10               |    |
| 5                                                                    | neuron development                             | 1.71E-10                                                                       | 79               |    |
|                                                                      | actin-myosin filament sliding                  | 4.30E-09                                                                       | 14               |    |
|                                                                      | cell projection organization                   | 1.08E-07                                                                       | 75               |    |
|                                                                      | axonogenesis                                   | 2.47E-07                                                                       | 52               |    |
|                                                                      | extracellular matrix organization              | 2.47E-07                                                                       | 28               |    |
|                                                                      | extracellular matrix                           | 5.39E-15                                                                       | 50               |    |
|                                                                      | contractile fiber part                         | 9.10E-07                                                                       | 23               |    |
|                                                                      | neuron part                                    | 9.11E-04                                                                       | 52               |    |
|                                                                      | 6                                              | Golgi vesicle transport                                                        | 1.58E-11         | 15 |
|                                                                      |                                                | activation of signaling protein activity involved in unfolded protein response | 4.04E-06         | 28 |
|                                                                      |                                                | Golgi membrane                                                                 | 1.08E-08         | 24 |
|                                                                      |                                                | tube development                                                               | 9.75E-08         | 23 |
| negative regulation of transcription from RNA polymerase II promoter |                                                | 4.77E-07                                                                       | 20               |    |
| 7                                                                    | negative regulation of cell differentiation    | 7.42E-07                                                                       | 24               |    |
|                                                                      | embryonic morphogenesis                        | 2.60E-06                                                                       | 12               |    |
|                                                                      | abnormal fetal growth/weight/body size         | 9.03E-08                                                                       | 35               |    |
|                                                                      | 8                                              | multicellular organismal signaling                                             | 2.11E-13         | 41 |
|                                                                      |                                                | neuron part                                                                    | 4.30E-11         | 26 |
| dendrite                                                             |                                                | 2.57E-05                                                                       | 10               |    |
| 9                                                                    | cell cycle phase                               | 7.96E-40                                                                       | 99               |    |
|                                                                      | DNA replication                                | 3.93E-33                                                                       | 54               |    |
|                                                                      |                                                | 5.26E-18                                                                       | 20               |    |
|                                                                      | condensed chromosome kinetochore               | 2.98E-14                                                                       | 19               |    |
|                                                                      | protein-DNA complex                            | 6.10E-09                                                                       | 18               |    |
| 10                                                                   | neuron projection morphogenesis                | 3.59E-07                                                                       | 61               |    |
|                                                                      | axon guidance                                  | 6.32E-05                                                                       | 38               |    |
|                                                                      | pattern specification process                  | 6.38E-04                                                                       | 51               |    |
|                                                                      | peptidyl-lysine acetylation                    | 7.13E-04                                                                       | 17               |    |
|                                                                      | nucleoplasm part                               | 2.71E-05                                                                       | 59               |    |
| 11                                                                   | translation                                    | 1.76E-03                                                                       | 17               |    |
|                                                                      | cellular respiration                           | 7.39E-07                                                                       | 50               |    |
|                                                                      |                                                | 2.08E-04                                                                       | 22               |    |
|                                                                      | mitochondrial part                             | 1.66E-11                                                                       | 65               |    |
|                                                                      | Genes down-regulated in brain from patients w  | 3.07E-11                                                                       | 77               |    |
| 12                                                                   | Rat Hypothalamic_Mansuy10_1931genes            | 5.04E-08                                                                       | 71               |    |
|                                                                      | M phase of mitotic cell cycle                  | 1.38E-37                                                                       | 55               |    |
|                                                                      | microtubule cytoskeleton organization          | 6.49E-17                                                                       | 37               |    |
|                                                                      | condensed chromosome                           | 1.27E-21                                                                       | 28               |    |
|                                                                      |                                                |                                                                                |                  |    |

.1,EDNRB,SEMA6A,CRMP1,GRIN3A,ANK3,NTM,HDC,VSX2,IL1RAPL1,LBX1,CSPG5,CXCR4,EPHB1,PLXNA2,VWC2,LEP,SPP1,SEMA6C,CDH11,CDH8,RAPGEF4,MDGA2,STXBP5,PTPRM,SEMA3E,PTPRR  
, CX3CL1,NLGN4X,IL1RAPL1,HAS2,EPHB1,PTPRT,VWC2,CNTNAP4,LEP,LAMA4,SULF1,SPP1,CDH10,CDH11,TRO,CDH8,PTPRM,SEMA3E  
TAC1,SYAP1,NLGN4X,CSPG5,CXCR4,PLP1,EPHB1,GRM7,CDH8,RAPGEF4,STXBP5,GRM1  
L1,CSPG5,CXCR4,EPHB1,PLXNA2,SPP1,SEMA6C,CDH11,CDH8,RAPGEF4,STXBP5,PTPRM,SEMA3E

CRMP1,GRIN3A,SKOR1,ANK3,SORT1,NTM,SORBS2,HDC,TAC1,NLGN4X,SEPT6,IL1RAPL1,CXCR4,EPHB1,CNTNAP4,GRM7,CDH8,RAPGEF4,INA,GRM1  
IS2,SYAP1,NLGN4X,SEPT6,IL1RAPL1,WLS,VWC2,GRM7,CDH8,RAPGEF4,STXBP5,GRM1

CMS,LIG1,CASP2,MCM7,ALMS1,FOXO1,MTBP,CCNE1,CLSPN,CDK2,TICRR,RRM2,PKD2,CDC6,PSME3,MASTL,PKMYT1

5,PSME3,PKMYT1

8,SPC24,WDHD1,CDT1,DMC1,MCM4,MCM3,MCM5,LIG1,MCM7,ASF1B,CLSPN,CDK2,CDC6,PSME3  
IX3,IRX3

BX3,IRX3

2  
,CAPRIN1,TNIK,MYH9,CRMP1,CACNB3,SHANK3,NCAM1,COL6A1,COL5A1,CAMK1D,ATCAY,DCLK1,ENAH,SPTAN1,LINGO1,LRP8,GPC1,RAB3A,SRC,RAB5C,SCN3B  
M2,SHANK3,CBLN1,PRRT2,ATCAY,LRRC4B,CTNND2,ENAH,SPTAN1,LRP8,RAB3A,SRC,SYNGR1

.BCL11A,LDB2,MATN2,COL9A3,MEF2C,COL3A1,COL4A5,GABRA5,LGI1,CTNNA2,ARX,VCAN,NPTX1,THY1,PICALM,CAP2,NR2E1,CCSAP,NGEF,KCNQ3,SEZ6,SEMA3A,OPCML,RORB,NR4A3,LHX2,ITGAV,DLG2,DLX5,DMD,FZD8,ISLR2,GFAP,TSPO,STX3,CAMK2B,TBR1,LPAR1,CTHRC1,GAS7,NBL1,POSTN,B3GNT2,NE  
4ATN2,COL9A3,COL3A1,COL4A5,LGI1,CTNNA2,ARX,VCAN,NPTX1,ULK4,TGFB3,THY1,KIT,PICALM,CAP2,NR2E1,NGEF,KCNQ3,CDC42EP5,SEZ6,SEMA3A,NR4A3,LHX2,ITGAV,DLX5,DMD,FZD8,ISLR2,GFAP,TSPO,STX3,CAMK2B,TBR1,LPAR1,CTHRC1,GAS7,NBL1,LMX1A,POSTN,B3GNT2,PXN,NEUROG2,EPHA5,EMX  
.TNNA2,ARX,VCAN,NPTX1,THY1,PICALM,CAP2,NR2E1,KCNQ3,SEMA3A,NR4A3,LHX2,ITGAV,DLX5,FZD8,ISLR2,TSPO,TBR1,LMX1A,POSTN,B3GNT2,NEUROG2,EPHA5,EMX2,NFIB,BCL11B,STMN1,SEMA4D,KAZN,EGR2,EFNA1,EFNB2,FEZF2  
E1,MFAP5,TNFRSF11B,LUM,ADAMTS3,LOX,POSTN,NPNT,ELN,EGFL6  
COL4A6,COL8A1,COL3A1,COL4A5,MGP,MFAP2,MFAP4,MMP11,VCAN,SCARA3,DCN,TGFB1,TGFB3,MFAP5,TNFRSF11B,OGN,PCOLCE,ADAMTS9,CTHRC1,ADAMTS1,LUM,ADAMTS3,LOX,POSTN,NPNT,CILP,LGALS1,ELN,LAMA3,SPOCK1,FBN3,EGFL6,NOV  
N,MYOZ3  
4P11,NPTX1,TGFB3,THY1, RGS7,RGS10,PICALM,CCSAP,NGEF,KCNQ3,KCNJ4,SEZ6,SEMA3A,ITPR3,SLC17A7,PALMD,DLG2,GABRG2,PPP1R1B,DMD,STX3,LPAR1,MYO5B,CACNA1E,DDN,SYN2,EPB41L3,EPHA5,GPM6A,NFIB,NDRG2,SPOCK1,NOV,GRIN2C  
ISR2,ARL1,SLC35E1,RAB5A,WIPI1,HYOU1,SRPR,KDELRL2,ALG3,SND1

.SLC35A2,FUT3,YKT6,COG6,ARF1,GOSR2,ARL1,WIPI1,ECE2,ICA1  
2B,NR2F2,GBX2  
2B,NR2F1,NR2F2

1,NR2F2,GBX2

3,NRXN1,GPM6B,GABRB1,GABRB3,JPH3,GRM3,ATP1A2,SLC1A3,LIN7B,SCN3B,GRIA2,TMOD2,SSTR2,GRIN1,ATP2B2  
FHC2,GABBR2,ADORA1,GPM6A,NRXN1,GABRB1,GABRB3,BMPR2,GRM3,ATP1A2,CDH13,SLC1A3,LIN7B,NRSN1,GRIA2,FABP7,TMOD2,PTPRO,GRIN1,CHL1,ATP2B2  
LC1A3,LIN7B,GRIA2,PTPRO,GRIN1,CHL1,ATP2B2

VLF1P,POLE2,POLA1,ASPM,PBK,RAD51C,MCM10,EXOSC10,HLTF,TRIP13,RBBP8,TIPIN,DNA2,GAS1,BUB1B,ATAD2,SGOL2,GMNN,SEH1L,KIF18A,RPL6,NUF2,SKA3,HNRNPA1,RPA3,PRIM1,NCAPG,GINS2,CKS1B,CKS2,NAE1,PCNA,LIN9,DCLRE1A,EZH2,CEP152,KIF23,MAD2L1,PLK4,CHEK2,CENPI,TAF5,NASP,WDI  
MPS,RPA3,PRIM1,GINS2,CKS1B,NAE1,PCNA,LIN9,RMI2,MAD2L1,POLQ,GINS3,NAP1L1,DUT,BAZ1A,NASP,WDHD1,GINS4,RMI1,PSMC3IP,MCM4,MCM3,MCM6,MCM2,MCM7,SMC4,SMC2,SSBP1,CCNE2,DSCC1,RRM1,RNASEH2A,CDK1

IEF2A,COL4A1,COL4A2,FZD2,PLD3,NAV2,WASF2,RPS6KA3,PLXNA1,TADA2B,RXRA,CSNK2A2,BAIAP2,USP22,DCC,TUBB3,AKAP17A,ADNP,ARHGAP39,DYNC1H1,ULK1,ITGA5,KAT2A,SMURF1,MYH9,KIF1B,CYFIP2,PXDN,CNTNAP1,DPYSL2,MAP1S,LLGL1,EP300,CYFIP1,LAMA5,LAMA1,PTPN1,EGFR,CDH4,PTPRF  
,CSNK2A2,USP22,DCC,TUBB3,AKAP17A,ARHGAP39,ITGA5,MYH9,CYFIP2,PXDN,CNTNAP1,DPYSL2,CYFIP1,LAMA5,LAMA1,PTPN1,EGFR,CDH4  
S,ATP2A2,DDB1,NCLN,FAT4,TRRAP,ARID1A,FOXK1,DCC,SP8,FOXP4,B4GALT5,DYNC1H1,BRD3,ITGA5,BCOR,PBX1,MACF1,SHROOM3,KAT2A,NR2F2,PTBP1,LRP5,TCF7L1,HTT,CBL,LLGL1,EP300,PRPF8,VANGL2,PCGF2,PCIF1,AGAP1

C,FOXO3,CTBP1,YEATS2,TADA2B,FOS,PHF17,REER,MTA1,USP22,RBM14,TRRAP,FOXK1,SYMPK,FOXP4,AKAP17A,TOP3A,JARID2,TCF3,PBX1,GATAD2A,SRRM2,KAT2A,MYC,GTAF2A1,TCF7L1,GTFC3,1,SUPT5H,HCFC1,ZC3H3,EP300,NCOR2,ELF4,PRPF8,RCOR2,ELAVL1,CARM1,PCGF2,RPRD2,PELP1

7,RPS24,RPS26,MTIF3,TCEAL8,TCEAL7,RPL26L1,MRPL22,MRPL15,RBM3,TCEAL1,DIO2,MRPL13,MRPS18C,MRPL42,MCTS1,HRSP12,MRPS28,MRPL39,GTFF2B,EEF1E1,MRPL33,MRPL47,RPSA,BZW1,SRP9,SRP19,MRPL1,MRPS14,MRPL20,NGDN,PPA2,CLK4  
FB3,NDUFB9,NDUFB6,UQCR10  
,MRPL27,COX17,MGST1,CYB5A,MRPS17,COX14,PIN4,ATP5C1,BAD,ATP5G3,MFF,FUNDC1,ATP5J,ATP5J,SLC25A17,CISD1,TOMM5,MRPL22,OAT,MRPL15,NDUFAF4,MINOS1,DLN,MRPL13,MRPS18C,MRPL42,HRSP12,CISD2,DECR1,MRPS28,TFAM,ACN9,MRPL39,C14orf2,NDUFA6,NDUFB1,NDUFA9,NDUFB3,N  
IGP,LSM5,COX11,COX7B,RPL14,UQCRH,UBA3,PFN4,UCLH3,ERGC2,SLC25A14,ORC3,TASP1,LRRN3,TTC1,PDCC5,ATP5C1,RPS26,TXNDC9,ATP5G3,MFF,TMEM126B,ATP5J,CISD1,MRPL22,OAT,MRPL15,ZNHIT3,THYN1,MOB4,TCEAL1,DIO2,DLN,MRPL13,BCAP29,SEP15,CCDC53,MCTS1,HRSP12,SHFM1,MRPS  
LSM5,COX7B,FAM92A1,MAGOH,UCLH3,KRCC1,NUDT5,UCLH5,KITLG,SNX7,TAF1D,PDCC5,PAK1IP1,UBE2T,NDUFAF4,COMMD8,MOB4,ANKRD49,NMD3,TCBE1,DLN,BCAP29,MRPL42,GEMIN6,CISD2,PCNA,CCDC47,ARV1,MAD2L1,HAT1,CHORDC1,EEF1E1,GTFF2H1,CCNC,MRPL47,MOSPD1,CLOCK,TAF9,PSMA3  
IPA1,TIMELESS,OIP5,KIF14,BORA,KIF15,CDCA3,KIF23,MST4,KIF4A,AURKA,CDCA5,NUSAP1,CHEK2,PRC1,MDK,FAM83D,CCNB1,CCNA2,BIRC5,NEK2,PLK1,AURKB,TTK,BUB3,CEP55,CDCA8,KIF20A,CCNB2,CDC25A,CDC25C,UBE2C,SGOL1,CDC20,CDK1,ESPL1  
PRC1,CCNB1,CCNA2,BIRC5,GPSM2,NEK2,PLK1,AURKB,TTK,BUB3,AUNIP,KIF20A,UBE2C,SGOL1,CDK1,ESPL1  
2AFX,NEK2,PLK1,AURKB,BUB3,SGOL1,CDK20,MKI67

UROG2,EPHA5,EMX2,NEUROD2,LGALS1,GPM6A,NFIB,SPOCK1,BCL11B,STMN1,SEMA4D,KAZN,EGR2,EFNA1,EFNB2,FEZF2

{2,LGALS1,GPM6A,NFIB,SPOCK1,BCL11B,STMN1,SEMA4D,KAZN,EGR2,EFNA1,EFNB2,FEZF2

HD1,HELLS,SEN6,TTF2,GINS4,CBS,NUP107,PSMC3IP,MCM4,MCM3,MCM6,MCM2,KIF20B,MCM7,FANCI,SMC4,NEK1,FIGNL1,ZWINT,CENPM,NUP37,RFWD3,SMC2,EXO1,STMN1,RUVBL1,CCNE2,DSCC1,RRM1,ZWILCH,CDK1,SPC25,ALG8,MASTL,NUP85

,CELSR3

DUF89,MRPL47,NDUFB6,UQCR10,TIMM23,MRPL1,MRPS14,MRPL20,PPA2  
28,PCNA,EEF1E1,C14orf2,NDUFB1,DCTN6,NDUFB3,RTN4,TAF9,C3orf14,CACYBP,CCNH,UQCR10,NME1,SRP19,MRPL20,PTS,NPY  
!,SIVA1,CACYBP,DPH3,RABGGTB,CCNH,GPR19,SKA2,BZW1,SRP9,NME1,MRPS14,SEPT7,KPNA5
