# Supplementary material
Source: PubMed Central journal article supplement (PMC5328859)
Supplement: NIHMS842380-supplement-Supp_TableS2.pdf [file NIHMS842380-supplement-Supp_TableS2.pdf]

Table S2 miRNA-reg of clusters

**SUPPLEMENTAL TABLE S2**

Correlation of expression of miRNAs identified and assayed in the iPS-derived neuronal cells with predicted target genes in each gene cluster from Fig. 5

| Gene Cluster   | miR               | Enrichment<br>p value | Correlation<br>estimate | Adjusted        |            |
|----------------|-------------------|-----------------------|-------------------------|-----------------|------------|
|                |                   |                       |                         | corr p<br>value | Source     |
| 1              | hsa-miR-96-5p     | 7.42E-05              | -0.762666               | 0.013433        | PicTar     |
|                | hsa-miR-590-3p    | 9.55E-05              | 0.5110724               | 0.143177        | TargetScan |
|                | hsa-miR-1271-5p   | 0.000388              | -0.370493               | 0.297861        | TargetScan |
|                | hsa-miR-96-5p     | 0.000388              | -0.762666               | 0.013433        | TargetScan |
|                | hsa-miR-218-5p    | 0.0004139             | 0.3713612               | 0.297861        | TargetScan |
|                | hsa-miR-130a-3p   | 0.003469              | 0.6967341               | 0.031496        | PicTar     |
|                | hsa-miR-340-3p    | 0.004069              | -0.943405               | 4.99E-05        | TargetScan |
|                | hsa-miR-340-5p    | 0.004069              | 0.7531593               | 0.014057        | TargetScan |
|                | hsa-miR-130b-3p   | 0.004069              | 0.7652058               | 0.013433        | PicTar     |
|                | hsa-miR-130b-5p   | 0.004069              | -0.657548               | 0.043926        | PicTar     |
|                | hsa-miR-129-5p    | 0.005572              | -0.57802                | 0.090475        | TargetScan |
|                | hsa-miR-181c-5p   | 0.00562               | 0.0385143               | 0.905406        | TargetScan |
|                | hsa-miR-181a-2-3p | 0.00562               | -0.648667               | 0.044994        | TargetScan |
|                | hsa-miR-181a-3p   | 0.00562               | -0.928995               | 0.000101        | TargetScan |
|                | hsa-miR-181a-5p   | 0.00562               | -0.174908               | 0.67045         | TargetScan |
|                | hsa-miR-181d      | 0.00562               | -0.552599               | 0.107014        | TargetScan |
|                | hsa-miR-181b-3p   | 0.00562               | -0.096156               | 0.799574        | TargetScan |
|                | hsa-miR-181b-5p   | 0.00562               | -0.446227               | 0.218886        | TargetScan |
|                | hsa-miR-186-5p    | 0.006293              | -0.146101               | 0.709629        | PicTar     |
|                | hsa-miR-182-5p    | 0.006992              | -0.388132               | 0.297861        | PicTar     |
| hsa-miR-204-5p | 0.007355          | 0.2708666             | 0.473358                | PicTar          |            |
| hsa-miR-9-3p   | 0.009041          | 0.9705853             | 3.96E-06                | TargetScan      |            |
| hsa-miR-9-5p   | 0.009041          | 0.6675004             | 0.042493                | TargetScan      |            |
| hsa-miR-138-5p | 0.009041          | 0.7926051             | 0.012649                | PicTar          |            |
| 2              | hsa-miR-330-3p    | 5.69E-06              | -0.581719               | 0.20164         | PicTar     |
|                | hsa-miR-30e-5p    | 5.69E-06              | -0.758657               | 0.04229         | PicTar     |
|                | hsa-miR-30c-1-3p  | 8.98E-06              | 0.033414                | 0.91789         | PicTar     |
|                | hsa-miR-30c-2-3p  | 8.98E-06              | 0.504531                | 0.20164         | PicTar     |
|                | hsa-miR-30c-5p    | 8.98E-06              | 0.472369                | 0.20164         | PicTar     |
|                | hsa-miR-30b-3p    | 8.98E-06              | 0.077495                | 0.9009          | PicTar     |
|                | hsa-miR-30b-5p    | 8.98E-06              | -0.495324               | 0.20164         | PicTar     |
|                | hsa-miR-30a-5p    | 8.98E-06              | -0.212028               | 0.70618         | PicTar     |
|                | hsa-miR-30d-3p    | 8.98E-06              | 0.516185                | 0.20164         | PicTar     |
|                | hsa-miR-30d-5p    | 8.98E-06              | -0.184965               | 0.70618         | PicTar     |
| 3              | hsa-miR-340-3p    | 5.27E-07              | -0.553203               | 0.1081          | TargetScan |
|                | hsa-miR-340-5p    | 5.27E-07              | 0.976299                | 1.91E-06        | TargetScan |
|                | hsa-miR-139-5p    | 1.18E-05              | -0.916503               | 0.0002          | TargetScan |

Table S2 miRNA-reg of clusters

|                   |           |           |          |            |
|-------------------|-----------|-----------|----------|------------|
| hsa-miR-218-5p    | 4.70E-05  | -0.228779 | 0.51529  | TargetScan |
| hsa-miR-23b-3p    | 4.70E-05  | -0.901911 | 0.00032  | TargetScan |
| hsa-miR-23a-3p    | 4.70E-05  | -0.899804 | 0.00034  | TargetScan |
| hsa-miR-331-3p    | 6.74E-05  | 0.438131  | 0.21945  | PicTar     |
| hsa-miR-331-5p    | 6.74E-05  | 0.597375  | 0.08344  | PicTar     |
| hsa-miR-128       | 6.74E-05  | -0.793403 | 0.0055   | TargetScan |
| hsa-miR-141-3p    | 6.74E-05  | -0.034628 | 0.92407  | TargetScan |
| hsa-miR-200a-3p   | 6.74E-05  | -0.490814 | 0.16146  | TargetScan |
| hsa-miR-222-3p    | 6.74E-05  | -0.937768 | 6.68E-05 | TargetScan |
| hsa-miR-221-3p    | 6.74E-05  | -0.851355 | 0.00149  | TargetScan |
| hsa-miR-221-5p    | 6.74E-05  | -0.978394 | 1.81E-06 | TargetScan |
| hsa-miR-27a-3p    | 6.92E-05  | -0.891332 | 0.00046  | PicTar     |
| hsa-miR-27a-5p    | 6.92E-05  | -0.693027 | 0.02797  | PicTar     |
| hsa-miR-27b-3p    | 8.40E-05  | -0.285345 | 0.44325  | PicTar     |
| hsa-miR-27b-5p    | 8.40E-05  | -0.825409 | 0.00297  | PicTar     |
| hsa-miR-218-5p    | 0.0001106 | -0.228779 | 0.51529  | PicTar     |
| hsa-miR-27b-3p    | 0.0001106 | -0.285345 | 0.44325  | TargetScan |
| hsa-miR-27b-5p    | 0.0001106 | -0.825409 | 0.00297  | TargetScan |
| hsa-miR-27a-3p    | 0.0001106 | -0.891332 | 0.00046  | TargetScan |
| hsa-miR-27a-5p    | 0.0001106 | -0.693027 | 0.02797  | TargetScan |
| hsa-miR-1271-5p   | 0.0001213 | -0.572611 | 0.09489  | TargetScan |
| hsa-miR-96-5p     | 0.0001213 | -0.538605 | 0.11919  | TargetScan |
| hsa-miR-196a-5p   | 0.0001213 | 0.939246  | 6.68E-05 | miRTarbase |
| hsa-miR-141-3p    | 0.0001397 | -0.034628 | 0.92407  | PicTar     |
| hsa-miR-96-5p     | 0.0006286 | -0.538605 | 0.11919  | PicTar     |
| hsa-miR-136-3p    | 0.0006635 | 0.931589  | 8.85E-05 | PicTar     |
| hsa-miR-129-5p    | 0.0006646 | -0.80516  | 0.00431  | TargetScan |
| hsa-miR-26b-3p    | 0.0006907 | -0.503373 | 0.15517  | TargetScan |
| hsa-miR-26b-5p    | 0.0006907 | -0.907029 | 0.00028  | TargetScan |
| hsa-miR-26a-2-3p  | 0.0006907 | 0.231797  | 0.51529  | TargetScan |
| hsa-miR-26a-5p    | 0.0006907 | -0.859981 | 0.00125  | TargetScan |
| hsa-miR-330-3p    | 0.0007595 | -0.290725 | 0.44253  | PicTar     |
| hsa-miR-101-3p    | 0.0007595 | 0.230821  | 0.51529  | TargetScan |
| hsa-miR-129-5p    | 0.0007595 | -0.80516  | 0.00431  | PicTar     |
| hsa-miR-181c-5p   | 0.0007595 | -0.568503 | 0.09527  | TargetScan |
| hsa-miR-181a-2-3p | 0.0007595 | -0.233622 | 0.51529  | TargetScan |
| hsa-miR-181a-3p   | 0.0007595 | -0.914972 | 0.0002   | TargetScan |
| hsa-miR-181a-5p   | 0.0007595 | -0.619812 | 0.06785  | TargetScan |
| hsa-miR-181d      | 0.0007595 | -0.883602 | 0.00061  | TargetScan |
| hsa-miR-181b-3p   | 0.0007595 | -0.577972 | 0.09171  | TargetScan |
| hsa-miR-181b-5p   | 0.0007595 | -0.256558 | 0.49426  | TargetScan |
| hsa-miR-204-5p    | 0.0007952 | 0.338719  | 0.35537  | PicTar     |
| hsa-miR-214-3p    | 0.001034  | -0.962702 | 1.08E-05 | TargetScan |

Table S2 miRNA-reg of clusters

|                   |          |           |          |            |
|-------------------|----------|-----------|----------|------------|
| hsa-miR-214-5p    | 0.001034 | -0.86998  | 0.00095  | TargetScan |
| hsa-miR-125b-1-3p | 0.001172 | 0.370887  | 0.31683  | PicTar     |
| hsa-miR-125b-5p   | 0.001172 | -0.48714  | 0.16313  | PicTar     |
| hsa-miR-182-5p    | 0.001246 | -0.347687 | 0.34717  | PicTar     |
| hsa-miR-221-3p    | 0.001332 | -0.851355 | 0.00149  | PicTar     |
| hsa-miR-221-5p    | 0.001332 | -0.978394 | 1.81E-06 | PicTar     |
| hsa-miR-200b-3p   | 0.001703 | 0.013471  | 0.96686  | TargetScan |
| hsa-miR-200c-3p   | 0.001703 | 0.824454  | 0.00297  | TargetScan |
| hsa-miR-342-3p    | 0.001821 | -0.03765  | 0.92407  | TargetScan |
| hsa-miR-217       | 0.001827 | 0.591828  | 0.08445  | TargetScan |
| hsa-miR-32-5p     | 0.002386 | 0.379838  | 0.30473  | PicTar     |
| hsa-miR-185-5p    | 0.002468 | 0.589267  | 0.08502  | TargetScan |
| hsa-miR-34a-5p    | 0.003063 | 0.594903  | 0.08344  | PicTar     |
| hsa-miR-26a-2-3p  | 0.003369 | 0.231797  | 0.51529  | PicTar     |
| hsa-miR-26a-5p    | 0.003369 | -0.859981 | 0.00125  | PicTar     |
| hsa-miR-222-3p    | 0.003369 | -0.937768 | 6.68E-05 | PicTar     |
| hsa-miR-32-5p     | 0.003369 | 0.379838  | 0.30473  | TargetScan |
| hsa-miR-25-3p     | 0.003369 | -0.498312 | 0.15899  | TargetScan |
| hsa-miR-92a-1-5p  | 0.003369 | -0.062245 | 0.88983  | TargetScan |
| hsa-miR-92a-3p    | 0.003369 | 0.474252  | 0.1772   | TargetScan |
| hsa-miR-92b-3p    | 0.003369 | 0.351844  | 0.34717  | TargetScan |
| hsa-miR-363-3p    | 0.003369 | 0.811878  | 0.00398  | TargetScan |
| hsa-miR-182-5p    | 0.003369 | -0.347687 | 0.34717  | TargetScan |
| hsa-miR-125a-3p   | 0.003376 | -0.697788 | 0.02732  | PicTar     |
| hsa-miR-125a-5p   | 0.003376 | -0.778246 | 0.00743  | PicTar     |
| hsa-miR-302a-3p   | 0.003517 | -0.705678 | 0.02487  | TargetScan |
| hsa-miR-302b-3p   | 0.003517 | 0.074309  | 0.87016  | TargetScan |
| hsa-miR-302d-3p   | 0.003517 | -0.708731 | 0.02432  | TargetScan |
| hsa-miR-214-3p    | 0.003717 | -0.962702 | 1.08E-05 | PicTar     |
| hsa-miR-214-5p    | 0.003717 | -0.86998  | 0.00095  | PicTar     |
| hsa-miR-454-3p    | 0.004793 | 0.810268  | 0.00402  | TargetScan |
| hsa-miR-454-5p    | 0.004793 | 0.059365  | 0.88983  | TargetScan |
| hsa-miR-130a-3p   | 0.004793 | 0.452039  | 0.20217  | TargetScan |
| hsa-miR-301b      | 0.004793 | 0.294104  | 0.44074  | TargetScan |
| hsa-miR-301a-3p   | 0.004793 | 0.392051  | 0.29108  | TargetScan |
| hsa-miR-301a-5p   | 0.004793 | 0.939103  | 6.68E-05 | TargetScan |
| hsa-miR-130b-3p   | 0.004793 | 0.950614  | 3.58E-05 | TargetScan |
| hsa-miR-130b-5p   | 0.004793 | -0.117643 | 0.76907  | TargetScan |
| hsa-miR-19b-3p    | 0.005611 | 0.768344  | 0.00886  | TargetScan |
| hsa-miR-19a-3p    | 0.005611 | 0.854768  | 0.00143  | TargetScan |
| hsa-miR-181c-5p   | 0.006783 | -0.568503 | 0.09527  | PicTar     |
| hsa-miR-181a-2-3p | 0.006895 | -0.233622 | 0.51529  | PicTar     |
| hsa-miR-181a-3p   | 0.006895 | -0.914972 | 0.0002   | PicTar     |

Table S2 miRNA-reg of clusters

|       |                  |          |           |          |            |
|-------|------------------|----------|-----------|----------|------------|
|       | hsa-miR-181a-5p  | 0.006895 | -0.619812 | 0.06785  | PicTar     |
|       | hsa-miR-181b-3p  | 0.006895 | -0.577972 | 0.09171  | PicTar     |
|       | hsa-miR-181b-5p  | 0.006895 | -0.256558 | 0.49426  | PicTar     |
|       | hsa-miR-204-5p   | 0.007446 | 0.338719  | 0.35537  | TargetScan |
|       | hsa-miR-26b-3p   | 0.007766 | -0.503373 | 0.15517  | PicTar     |
|       | hsa-miR-26b-5p   | 0.007766 | -0.907029 | 0.00028  | PicTar     |
|       | hsa-miR-34c-5p   | 0.008526 | 0.459981  | 0.19384  | TargetScan |
|       | hsa-miR-34a-5p   | 0.008526 | 0.594903  | 0.08344  | TargetScan |
|       | hsa-miR-23b-3p   | 0.008581 | -0.901911 | 0.00032  | PicTar     |
|       | hsa-miR-107      | 0.008931 | 0.490417  | 0.16146  | TargetScan |
|       | hsa-miR-107      | 0.009059 | 0.490417  | 0.16146  | PicTar     |
|       | hsa-miR-136-3p   | 0.009935 | 0.931589  | 8.85E-05 | TargetScan |
| ----- |                  |          |           |          |            |
| 4     | hsa-miR-20a-5p   | 0.001694 | -0.022331 | 0.94508  | TargetScan |
|       | hsa-miR-106a-5p  | 0.001694 | -0.177675 | 0.93195  | TargetScan |
|       | hsa-miR-17-5p    | 0.001694 | -0.022866 | 0.94508  | TargetScan |
|       | hsa-miR-93-3p    | 0.001694 | -0.169196 | 0.93195  | TargetScan |
|       | hsa-miR-93-5p    | 0.001694 | -0.322188 | 0.6142   | TargetScan |
|       | hsa-miR-20b-5p   | 0.001694 | -0.108762 | 0.94508  | TargetScan |
|       | hsa-miR-106b-3p  | 0.001694 | -0.408841 | 0.52753  | TargetScan |
|       | hsa-miR-106b-5p  | 0.001694 | 0.649884  | 0.31026  | TargetScan |
|       | hsa-miR-34c-5p   | 0.0019   | 0.02272   | 0.94508  | PicTar     |
|       | hsa-miR-34c-5p   | 0.004391 | 0.02272   | 0.94508  | TargetScan |
|       | hsa-miR-34a-5p   | 0.004391 | 0.407631  | 0.52753  | TargetScan |
|       | hsa-miR-34a-5p   | 0.005321 | 0.407631  | 0.52753  | PicTar     |
|       | hsa-miR-1271-5p  | 0.007104 | -0.568103 | 0.37781  | TargetScan |
|       | hsa-miR-96-5p    | 0.007104 | -0.330935 | 0.6142   | TargetScan |
| ----- |                  |          |           |          |            |
| 5     | hsa-miR-200b-3p  | 0.003944 | -0.059457 | 0.85437  | PicTar     |
|       | hsa-miR-200c-3p  | 0.003944 | -0.637219 | 0.05167  | PicTar     |
| ----- |                  |          |           |          |            |
| 6     | hsa-miR-330-3p   | 5.69E-06 | -0.149106 | 0.71525  | PicTar     |
|       | hsa-miR-30e-5p   | 5.69E-06 | 0.153124  | 0.71525  | PicTar     |
|       | hsa-miR-30c-1-3p | 8.98E-06 | 0.59758   | 0.20086  | PicTar     |
|       | hsa-miR-30c-2-3p | 8.98E-06 | 0.168932  | 0.71525  | PicTar     |
|       | hsa-miR-30c-5p   | 8.98E-06 | 0.269662  | 0.66109  | PicTar     |
|       | hsa-miR-30b-3p   | 8.98E-06 | 0.447731  | 0.34799  | PicTar     |
|       | hsa-miR-30b-5p   | 8.98E-06 | 0.622092  | 0.20086  | PicTar     |
|       | hsa-miR-30a-5p   | 8.98E-06 | -0.420045 | 0.34799  | PicTar     |
|       | hsa-miR-30d-3p   | 8.98E-06 | 0.038971  | 0.90429  | PicTar     |
|       | hsa-miR-30d-5p   | 8.98E-06 | -0.483428 | 0.34799  | PicTar     |
| ----- |                  |          |           |          |            |
| 7     | hsa-let-7g-5p    | 2.05E-06 | -0.729939 | 0.00704  | PicTar     |

Table S2 miRNA-reg of clusters

|       |                  |           |           |          |            |
|-------|------------------|-----------|-----------|----------|------------|
|       | hsa-let-7f-5p    | 2.05E-06  | -0.952921 | 3.37E-06 | PicTar     |
|       | hsa-let-7a-5p    | 2.54E-06  | -0.932076 | 1.35E-05 | PicTar     |
|       | hsa-let-7b-5p    | 3.89E-06  | -0.987149 | 1.08E-08 | PicTar     |
| ----- |                  |           |           |          |            |
| 8     | hsa-miR-218-5p   | 0.008504  | 0.939068  | 5.97E-06 | TargetScan |
| 9     | hsa-miR-330-3p   | 5.69E-06  | -0.192677 | 0.74824  | PicTar     |
|       | hsa-miR-30e-5p   | 5.69E-06  | -0.627535 | 0.14462  | PicTar     |
|       | hsa-miR-30c-1-3p | 8.98E-06  | -0.063371 | 0.84488  | PicTar     |
|       | hsa-miR-30c-2-3p | 8.98E-06  | 0.173428  | 0.74824  | PicTar     |
|       | hsa-miR-30c-5p   | 8.98E-06  | 0.169433  | 0.74824  | PicTar     |
|       | hsa-miR-30b-3p   | 8.98E-06  | 0.112831  | 0.80777  | PicTar     |
|       | hsa-miR-30b-5p   | 8.98E-06  | -0.917938 | 0.00026  | PicTar     |
|       | hsa-miR-30a-5p   | 8.98E-06  | -0.339503 | 0.64379  | PicTar     |
|       | hsa-miR-30d-3p   | 8.98E-06  | 0.394421  | 0.64379  | PicTar     |
|       | hsa-miR-30d-5p   | 8.98E-06  | 0.312989  | 0.64379  | PicTar     |
| ----- |                  |           |           |          |            |
| 10    | hsa-miR-9-3p     | 3.54E-05  | 0.265191  | 0.46231  | TargetScan |
|       | hsa-miR-9-5p     | 3.54E-05  | 0.257567  | 0.46231  | TargetScan |
|       | hsa-miR-30b-3p   | 3.54E-05  | 0.400616  | 0.37057  | PicTar     |
|       | hsa-miR-30b-5p   | 3.54E-05  | 0.459575  | 0.31829  | PicTar     |
|       | hsa-miR-30c-1-3p | 3.54E-05  | 0.514854  | 0.30235  | PicTar     |
|       | hsa-miR-30c-2-3p | 3.54E-05  | 0.492353  | 0.30235  | PicTar     |
|       | hsa-miR-30c-5p   | 3.54E-05  | 0.63336   | 0.12359  | PicTar     |
|       | hsa-miR-30a-5p   | 3.54E-05  | -0.277453 | 0.46231  | PicTar     |
|       | hsa-miR-30d-3p   | 3.54E-05  | 0.264025  | 0.46231  | PicTar     |
|       | hsa-miR-30d-5p   | 3.54E-05  | -0.696447 | 0.08335  | PicTar     |
|       | hsa-miR-30e-5p   | 3.54E-05  | -0.361047 | 0.41919  | PicTar     |
|       | hsa-miR-124-3p   | 0.0004176 | 0.034399  | 0.91548  | TargetScan |
|       | hsa-miR-200b-3p  | 0.001493  | 0.108799  | 0.76019  | TargetScan |
|       | hsa-miR-200c-3p  | 0.001493  | 0.71592   | 0.08335  | TargetScan |
|       | hsa-miR-410      | 0.001493  | 0.689961  | 0.08335  | TargetScan |
|       | hsa-miR-214-3p   | 0.001906  | -0.740528 | 0.08335  | PicTar     |
|       | hsa-miR-214-5p   | 0.001906  | -0.448506 | 0.31829  | PicTar     |
|       | hsa-miR-29a-3p   | 0.002222  | -0.265716 | 0.46231  | TargetScan |
|       | hsa-miR-30b-3p   | 0.003907  | 0.400616  | 0.37057  | TargetScan |
|       | hsa-miR-30b-5p   | 0.003907  | 0.459575  | 0.31829  | TargetScan |
|       | hsa-miR-30e-3p   | 0.003907  | -0.133908 | 0.72343  | TargetScan |
|       | hsa-miR-30e-5p   | 0.003907  | -0.361047 | 0.41919  | TargetScan |
|       | hsa-miR-30a-3p   | 0.003907  | 0.28996   | 0.46231  | TargetScan |
|       | hsa-miR-30a-5p   | 0.003907  | -0.277453 | 0.46231  | TargetScan |
|       | hsa-miR-30d-3p   | 0.003907  | 0.264025  | 0.46231  | TargetScan |
|       | hsa-miR-30d-5p   | 0.003907  | -0.696447 | 0.08335  | TargetScan |

Table S2 miRNA-reg of clusters

|       |                  |          |           |          |            |
|-------|------------------|----------|-----------|----------|------------|
|       | hsa-miR-30c-1-3p | 0.003907 | 0.514854  | 0.30235  | TargetScan |
|       | hsa-miR-30c-2-3p | 0.003907 | 0.492353  | 0.30235  | TargetScan |
|       | hsa-miR-30c-5p   | 0.003907 | 0.63336   | 0.12359  | TargetScan |
|       | hsa-miR-129-5p   | 0.006007 | -0.443018 | 0.31829  | TargetScan |
|       | hsa-miR-9-3p     | 0.00663  | 0.265191  | 0.46231  | PicTar     |
|       | hsa-miR-9-5p     | 0.00663  | 0.257567  | 0.46231  | PicTar     |
| ----- |                  |          |           |          |            |
| 11    | hsa-miR-330-3p   | 5.69E-06 | 0.563038  | 0.2832   | PicTar     |
|       | hsa-miR-30e-5p   | 5.69E-06 | 0.208421  | 0.64457  | PicTar     |
|       | hsa-miR-30c-1-3p | 8.98E-06 | -0.444782 | 0.29478  | PicTar     |
|       | hsa-miR-30c-2-3p | 8.98E-06 | -0.310386 | 0.46593  | PicTar     |
|       | hsa-miR-30c-5p   | 8.98E-06 | -0.477412 | 0.29129  | PicTar     |
|       | hsa-miR-30b-3p   | 8.98E-06 | -0.343861 | 0.45629  | PicTar     |
|       | hsa-miR-30b-5p   | 8.98E-06 | -0.487383 | 0.29129  | PicTar     |
|       | hsa-miR-30a-5p   | 8.98E-06 | 0.137324  | 0.70523  | PicTar     |
|       | hsa-miR-30d-3p   | 8.98E-06 | -0.122179 | 0.70523  | PicTar     |
|       | hsa-miR-30d-5p   | 8.98E-06 | 0.573684  | 0.2832   | PicTar     |
| ----- |                  |          |           |          |            |
| 12    | hsa-miR-330-3p   | 5.69E-06 | -0.817351 | 0.00265  | PicTar     |
|       | hsa-miR-30e-5p   | 5.69E-06 | -0.966323 | 3.22E-06 | PicTar     |
|       | hsa-miR-30c-1-3p | 8.98E-06 | 0.572236  | 0.06483  | PicTar     |
|       | hsa-miR-30c-2-3p | 8.98E-06 | 0.81227   | 0.00265  | PicTar     |
|       | hsa-miR-30c-5p   | 8.98E-06 | 0.894198  | 0.00044  | PicTar     |
|       | hsa-miR-30b-3p   | 8.98E-06 | 0.594428  | 0.0593   | PicTar     |
|       | hsa-miR-30b-5p   | 8.98E-06 | -0.348684 | 0.26665  | PicTar     |
|       | hsa-miR-30a-5p   | 8.98E-06 | -0.848862 | 0.0016   | PicTar     |
|       | hsa-miR-30d-3p   | 8.98E-06 | 0.736214  | 0.01055  | PicTar     |
|       | hsa-miR-30d-5p   | 8.98E-06 | -0.516486 | 0.09508  | PicTar     |
