# Supplementary material
Source: PubMed Central journal article supplement (PMC5328859)
Supplement: NIHMS842380-supplement-Supp_TableS3.pdf [file NIHMS842380-supplement-Supp_TableS3.pdf]

**SUPPLEMENTAL TABLE S3**

details for miRNA clusters from Figure S4

| <b>cluster#</b> | <b>miRNA</b> |
|-----------------|--------------|
| mR1             | let-7a-5p    |
| mR1             | let-7b-5p    |
| mR1             | let-7d-3p    |
| mR1             | let-7d-5p    |
| mR1             | let-7e-3p    |
| mR1             | let-7e-5p    |
| mR1             | let-7f-5p    |
| mR1             | let-7i-5p    |
| mR1             | miR-1        |
| mR1             | miR-125a-3p  |
| mR1             | miR-125a-5p  |
| mR1             | miR-125b-5p  |
| mR1             | miR-126-3p   |
| mR1             | miR-126-5p   |
| mR1             | miR-128      |
| mR1             | miR-129-5p   |
| mR1             | miR-135b-5p  |
| mR1             | miR-139-5p   |
| mR1             | miR-143-3p   |
| mR1             | miR-145-5p   |
| mR1             | miR-146a-5p  |
| mR1             | miR-146b-5p  |
| mR1             | miR-181a-3p  |
| mR1             | miR-181a-5p  |
| mR1             | miR-181b-3p  |
| mR1             | miR-181c-5p  |
| mR1             | miR-181d     |
| mR1             | miR-186-5p   |
| mR1             | miR-193b-5p  |
| mR1             | miR-194-5p   |
| mR1             | miR-195-5p   |
| mR1             | miR-199a-3p  |
| mR1             | miR-199a-5p  |
| mR1             | miR-199b-3p  |
| mR1             | miR-199b-5p  |
| mR1             | miR-200a-3p  |
| mR1             | miR-203a     |
| mR1             | miR-206      |
| mR1             | miR-210      |
| mR1             | miR-214-3p   |
| mR1             | miR-214-5p   |
| mR1             | miR-221-5p   |

mR1 miR-222-3p  
mR1 miR-23a-3p  
mR1 miR-23b-3p  
mR1 miR-26a-5p  
mR1 miR-26b-5p  
mR1 miR-27a-3p  
mR1 miR-27a-5p  
mR1 miR-302a-3p  
mR1 miR-30d-5p  
mR1 miR-31-5p  
mR1 miR-324-3p  
mR1 miR-365a-3p  
mR1 miR-365b-3p  
mR1 miR-374b-3p  
mR1 miR-378a-3p  
mR1 miR-378a-5p  
mR1 miR-378d  
mR1 miR-3940-3p  
mR1 miR-424-3p  
mR1 miR-424-5p  
mR1 miR-450a-5p  
mR1 miR-455-5p  
mR1 miR-574-3p  
mR1 miR-628-5p  
mR1 miR-664a-3p  
mR1 miR-708-3p  
mR1 miR-708-5p  
mR1 miR-887  
mR1 miR-93-3p  
mR1 miR-98-5p  
mR1 miR-99a-5p  
mR2 miR-103a-2-5p  
mR2 miR-1271-5p  
mR2 miR-1285-3p  
mR2 miR-1306-5p  
mR2 miR-1307-3p  
mR2 miR-132-3p  
mR2 miR-145-3p  
mR2 miR-148b-3p  
mR2 miR-151a-3p  
mR2 miR-151a-5p  
mR2 miR-155-5p  
mR2 miR-15b-3p  
mR2 miR-182-5p  
mR2 miR-183-5p  
mR2 miR-200b-3p  
mR2 miR-212-5p

mR2 miR-25-3p  
mR2 miR-28-3p  
mR2 miR-302b-3p  
mR2 miR-302d-3p  
mR2 miR-3074-3p  
mR2 miR-30e-3p  
mR2 miR-362-5p  
mR2 miR-423-3p  
mR2 miR-4286  
mR2 miR-450b-5p  
mR2 miR-4717-3p  
mR2 miR-484  
mR2 miR-500a-3p  
mR2 miR-501-3p  
mR2 miR-502-3p  
mR2 miR-503-5p  
mR2 miR-544b  
mR2 miR-576-5p  
mR2 miR-99b-3p  
mR3 miR-103a-3p  
mR3 miR-106b-5p  
mR3 miR-107  
mR3 miR-130a-3p  
mR3 miR-130b-3p  
mR3 miR-140-5p  
mR3 miR-15a-5p  
mR3 miR-188-3p  
mR3 miR-188-5p  
mR3 miR-193b-3p  
mR3 miR-19a-3p  
mR3 miR-19b-3p  
mR3 miR-301a-3p  
mR3 miR-30b-5p  
mR3 miR-32-5p  
mR3 miR-320a  
mR3 miR-328  
mR3 miR-339-3p  
mR3 miR-34a-5p  
mR3 miR-34c-5p  
mR3 miR-374b-5p  
mR3 miR-383  
mR3 miR-425-5p  
mR3 miR-454-3p  
mR3 miR-487b  
mR3 miR-532-5p  
mR3 miR-548ab  
mR3 miR-582-5p

|     |               |
|-----|---------------|
| mR3 | miR-660-5p    |
| mR3 | miR-7-5p      |
| mR3 | miR-769-3p    |
| mR3 | miR-9-3p      |
| mR3 | miR-9-5p      |
| mR4 | miR-106b-3p   |
| mR4 | miR-1296      |
| mR4 | miR-1301      |
| mR4 | miR-130b-5p   |
| mR4 | miR-148a-3p   |
| mR4 | miR-149-5p    |
| mR4 | miR-15b-5p    |
| mR4 | miR-181a-2-3p |
| mR4 | miR-181b-5p   |
| mR4 | miR-191-5p    |
| mR4 | miR-192-5p    |
| mR4 | miR-197-3p    |
| mR4 | miR-215       |
| mR4 | miR-221-3p    |
| mR4 | miR-2682-5p   |
| mR4 | miR-26a-2-3p  |
| mR4 | miR-26b-3p    |
| mR4 | miR-27b-3p    |
| mR4 | miR-27b-5p    |
| mR4 | miR-296-3p    |
| mR4 | miR-301b      |
| mR4 | miR-30a-3p    |
| mR4 | miR-30b-3p    |
| mR4 | miR-30c-1-3p  |
| mR4 | miR-30c-5p    |
| mR4 | miR-30d-3p    |
| mR4 | miR-3158-3p   |
| mR4 | miR-320b      |
| mR4 | miR-320c      |
| mR4 | miR-335-3p    |
| mR4 | miR-339-5p    |
| mR4 | miR-340-3p    |
| mR4 | miR-345-5p    |
| mR4 | miR-3605-5p   |
| mR4 | miR-361-5p    |
| mR4 | miR-3677-3p   |
| mR4 | miR-3909      |
| mR4 | miR-421       |
| mR4 | miR-425-3p    |
| mR4 | miR-452-5p    |
| mR4 | miR-454-5p    |
| mR4 | miR-455-3p    |

mR4 miR-542-3p  
mR4 miR-548ay-5p  
mR4 miR-548i  
mR4 miR-548k  
mR4 miR-550a-5p  
mR4 miR-5581-3p  
mR4 miR-561-5p  
mR4 miR-5699  
mR4 miR-570-3p  
mR4 miR-574-5p  
mR4 miR-576-3p  
mR4 miR-625-5p  
mR4 miR-641  
mR4 miR-671-3p  
mR4 miR-92a-1-5p  
mR4 miR-92a-3p  
mR4 miR-92b-3p  
mR4 miR-941  
mR4 miR-96-5p  
mR5 let-7c  
mR5 let-7g-5p  
mR5 miR-101-3p  
mR5 miR-124-3p  
mR5 miR-1249  
mR5 miR-132-5p  
mR5 miR-135a-5p  
mR5 miR-138-5p  
mR5 miR-140-3p  
mR5 miR-141-3p  
mR5 miR-151b  
mR5 miR-152  
mR5 miR-16-5p  
mR5 miR-21-5p  
mR5 miR-218-5p  
mR5 miR-22-3p  
mR5 miR-22-5p  
mR5 miR-24-3p  
mR5 miR-29a-3p  
mR5 miR-30a-5p  
mR5 miR-30e-5p  
mR5 miR-320d  
mR5 miR-324-5p  
mR5 miR-330-3p  
mR5 miR-342-3p  
mR5 miR-361-3p  
mR5 miR-362-3p  
mR5 miR-374a-5p

|     |               |
|-----|---------------|
| mR5 | miR-423-5p    |
| mR5 | miR-4791      |
| mR5 | miR-500a-5p   |
| mR5 | miR-501-5p    |
| mR5 | miR-505-3p    |
| mR5 | miR-532-3p    |
| mR5 | miR-590-3p    |
| mR5 | miR-598       |
| mR5 | miR-618       |
| mR5 | miR-628-3p    |
| mR5 | miR-7-1-3p    |
| mR5 | miR-744-3p    |
| mR5 | miR-874       |
| mR6 | miR-100-5p    |
| mR6 | miR-106a-5p   |
| mR6 | miR-10a-5p    |
| mR6 | miR-10b-3p    |
| mR6 | miR-10b-5p    |
| mR6 | miR-1180      |
| mR6 | miR-1251      |
| mR6 | miR-125b-1-3p |
| mR6 | miR-127-3p    |
| mR6 | miR-136-3p    |
| mR6 | miR-148a-5p   |
| mR6 | miR-17-5p     |
| mR6 | miR-185-5p    |
| mR6 | miR-18a-3p    |
| mR6 | miR-18a-5p    |
| mR6 | miR-196a-5p   |
| mR6 | miR-196b-5p   |
| mR6 | miR-200c-3p   |
| mR6 | miR-204-5p    |
| mR6 | miR-20a-5p    |
| mR6 | miR-20b-5p    |
| mR6 | miR-21-3p     |
| mR6 | miR-217       |
| mR6 | miR-219-2-3p  |
| mR6 | miR-28-5p     |
| mR6 | miR-296-5p    |
| mR6 | miR-301a-5p   |
| mR6 | miR-30c-2-3p  |
| mR6 | miR-331-3p    |
| mR6 | miR-331-5p    |
| mR6 | miR-335-5p    |
| mR6 | miR-340-5p    |
| mR6 | miR-346       |
| mR6 | miR-363-3p    |

|     |             |
|-----|-------------|
| mR6 | miR-370     |
| mR6 | miR-374a-3p |
| mR6 | miR-379-5p  |
| mR6 | miR-409-5p  |
| mR6 | miR-410     |
| mR6 | miR-411-5p  |
| mR6 | miR-4677-3p |
| mR6 | miR-486-5p  |
| mR6 | miR-548e    |
| mR6 | miR-550a-3p |
| mR6 | miR-589-5p  |
| mR6 | miR-625-3p  |
| mR6 | miR-629-5p  |
| mR6 | miR-651     |
| mR6 | miR-652-3p  |
| mR6 | miR-656     |
| mR6 | miR-671-5p  |
| mR6 | miR-744-5p  |
| mR6 | miR-766-3p  |
| mR6 | miR-769-5p  |
| mR6 | miR-93-5p   |
| mR6 | miR-940     |
