# Supplementary material
Source: PubMed Central journal article supplement (PMC5328859)
Supplement: NIHMS842380-supplement-Supp_TableS4.pdf [file NIHMS842380-supplement-Supp_TableS4.pdf]

|           |                                                            |           |          |                   |        |           |                 |        |
|-----------|------------------------------------------------------------|-----------|----------|-------------------|--------|-----------|-----------------|--------|
| GPT2      | GPT2 (glutamic pyruvate transaminase (alanine aminotr      | 84706     | TCEAL3   | TCEAL3 (transc    | 85012  | PYGO2     | PYGO2 (pygopi   | 90780  |
| GPX1      | GPX1 (glutathione peroxidase 1)                            | 2876      | TCEAL5   | TCEAL5 (transc    | 340543 | RAB11B    | RAB11B (RAB1:   | 9230   |
| GPX6      | GPX6 (glutathione peroxidase 6)                            | 257202    | TCF7L1   | TCF7L1 (transc    | 83439  | RAD9B     | RAD9B (RAD9 c   | 144715 |
| GPX7      | GPX7 (glutathione peroxidase 7)                            | 2882      | TENM4    | TENM4 (teneur     | 26011  | RBM12     | RBM12 (RNA bi   | 10137  |
| GPX8      | GPX8 (glutathione peroxidase 8 (putative))                 | 493869    | THAP11   | THAP11 (THAP      | 57215  | RG57BP    | RG57BP (regula  | 401190 |
| GRAMD1B   | GRAMD1B (GRAM domain containing 1B)                        | 54746     | THRA     | THRA (thyroid I   | 7067   | RNF141    | RNF141 (ring fi | 50862  |
| GRAMD1C   | GRAMD1C (GRAM domain containing 1C)                        | 54762     | THRAP3   | THRAP3 (thyroi    | 9967   | RPE       | RPE (ribulose-5 | 6120   |
| GRAMD2    | GRAMD2 (GRAM domain containing 2)                          | 196996    | TIMP4    | TIMP4 (TIMP m     | 7079   | RPRM      | RPRM (reprim    | 56475  |
| GRAMD3    | GRAMD3 (GRAM domain containing 3)                          | 65983     | TIPARP   | TIPARP (TCDD-i    | 25976  | RPS9      | RPS9 (ribosom   | 6203   |
| GRAMD4    | GRAMD4 (GRAM domain containing 4)                          | 23151     | TLX1     | TLX1 (T-cell leu  | 3195   | SCIMP     | SCIMP (SLP ada  | 388325 |
| GRASP     | GRASP (GRP1 (general receptor for phosphoinositides 1)     | 160622    | TMEM132C | TMEM132C (tri     | 92293  | SCRT1     | SCRT1 (scratch  | 83482  |
| GRB10     | GRB10 (growth factor receptor-bound protein 10)            | 2887      | TMEM184A | TMEM184A (tri     | 202915 | SECISBP2L | SECISBP2L (SEC  | 9728   |
| GRB2      | GRB2 (growth factor receptor-bound protein 2)              | 2885      | TMEM37   | TMEM37 (trans     | 140738 | SEN2      | SEN2 (SUMO1     | 59343  |
| GRB7      | GRB7 (growth factor receptor-bound protein 7)              | 2886      | TMEM38B  | TMEM38B (trar     | 55151  | SGMS2     | SGMS2 (sphing   | 166929 |
| GREB1     | GREB1 (growth regulation by estrogen in breast cancer      | 9687      | TMEM40   | TMEM40 (trans     | 55287  | SLC45A3   | SLC45A3 (solut  | 85414  |
| GREB1L    | GREB1L (growth regulation by estrogen in breast cancer     | 80000     | TMTCA    | TMTCA (transm     | 84899  |           |                 |        |
| GREM1     | GREM1 (gremlin 1, DAN family BMP antagonist)               | 26585     | TNFAIP8  | TNFAIP8 (tumo     | 25816  |           |                 |        |
| GREM2     | GREM2 (gremlin 2, DAN family BMP antagonist)               | 64388     | TNFSF4   | TNFSF4 (tumor     | 7292   |           |                 |        |
| GRHL1     | GRHL1 (grainyhead-like transcription factor 1)             | 29841     | TOM11L2  | TOM11L2 (targe    | 146691 |           |                 |        |
| GRHL2     | GRHL2 (grainyhead-like transcription factor 2)             | 79977     | TP53BP2  | TP53BP2 (tumc     | 7159   |           |                 |        |
| GRHL3     | GRHL3 (grainyhead-like transcription factor 3)             | 57822     | TRIM13   | TRIM13 (tripart   | 10206  |           |                 |        |
| GRHPR     | GRHPR (glyoxylate reductase/hydroxypyruvate reductas       | 9380      | TRIM62   | TRIM62 (tripart   | 55223  |           |                 |        |
| GRIA1     | GRIA1 (glutamate receptor, ionotropic, AMPA 1)             | 2890      | TRPC5    | TRPC5 (transier   | 7224   |           |                 |        |
| GRIA2     | GRIA2 (glutamate receptor, ionotropic, AMPA 2)             | 2891      | TRPC7    | TRPC7 (transier   | 57113  |           |                 |        |
| GRIA4     | GRIA4 (glutamate receptor, ionotropic, AMPA 4)             | 2893      | TRUB2    | TRUB2 (Tru8 ps    | 26995  |           |                 |        |
| GRID1     | GRID1 (glutamate receptor, ionotropic, delta 1)            | 2894      | TSPAN31  | TSPAN31 (tetra    | 6302   |           |                 |        |
| GRID2     | GRID2 (glutamate receptor, ionotropic, delta 2)            | 2895      | TSR1     | TSR1 (TSR1, 20:   | 55720  |           |                 |        |
| GRIK1-AS2 | GRIK1-AS2 (GRIK1 antisense RNA 2)                          | 100379661 | TTC30A   | TTC30A (tetra     | 92104  |           |                 |        |
| GRIK2     | GRIK2 (glutamate receptor, ionotropic, kainate 2)          | 2898      | TTL12    | TTL12 (tubulin    | 23170  |           |                 |        |
| GRIK3     | GRIK3 (glutamate receptor, ionotropic, kainate 3)          | 2899      | TUBB6    | TUBB6 (tubulin    | 84617  |           |                 |        |
| GRIK4     | GRIK4 (glutamate receptor, ionotropic, kainate 4)          | 2900      | UBE2R2   | UBE2R2 (ubiqu     | 54926  |           |                 |        |
| GRIN1     | GRIN1 (glutamate receptor, ionotropic, N-methyl D-aspi     | 2902      | UBP1     | UBP1 (upstrear    | 7342   |           |                 |        |
| GRIN2A    | GRIN2A (glutamate receptor, ionotropic, N-methyl D-asi     | 2903      | UHRF1BP1 | UHRF1BP1 (UH      | 54887  |           |                 |        |
| GRIN2B    | GRIN2B (glutamate receptor, ionotropic, N-methyl D-asi     | 2904      | UIMC1    | UIMC1 (ubiquit    | 51720  |           |                 |        |
| GRIN2D    | GRIN2D (glutamate receptor, ionotropic, N-methyl D-asi     | 2906      | UNC5A    | UNC5A (unc-5 i    | 90249  |           |                 |        |
| GRIN3A    | GRIN3A (glutamate receptor, ionotropic, N-methyl D-asi     | 116443    | UPF2     | UPF2 (UPF2 reg    | 26019  |           |                 |        |
| GRINA     | GRINA (glutamate receptor, ionotropic, N-methyl D-aspi     | 2907      | USP10    | USP10 (ubiquit    | 9100   |           |                 |        |
| GRIP1     | GRIP1 (glutamate receptor interacting protein 1)           | 23426     | USP39    | USP39 (ubiquit    | 10713  |           |                 |        |
| GRIPAP1   | GRIPAP1 (GRIP1 associated protein 1)                       | 56850     | VAPB     | VAPB (VAMP (v     | 9217   |           |                 |        |
| GRK5      | GRK5 (G protein-coupled receptor kinase 5)                 | 2869      | VGLL3    | VGLL3 (vestigia   | 389136 |           |                 |        |
| GRK6      | GRK6 (G protein-coupled receptor kinase 6)                 | 2870      | VNN3     | VNN3 (vanin 3)    | 55350  |           |                 |        |
| GRM1      | GRM1 (glutamate receptor, metabotropic 1)                  | 2911      | VPS26A   | VPS26A (VPS26     | 9559   |           |                 |        |
| GRM2      | GRM2 (glutamate receptor, metabotropic 2)                  | 2912      | VPS26B   | VPS26B (VPS26     | 112936 |           |                 |        |
| GRM3      | GRM3 (glutamate receptor, metabotropic 3)                  | 2913      | VPS37A   | VPS37A (vacuo     | 137492 |           |                 |        |
| GRM4      | GRM4 (glutamate receptor, metabotropic 4)                  | 2914      | VPS53    | VPS53 (vacuola    | 55275  |           |                 |        |
| GRM5      | GRM5 (glutamate receptor, metabotropic 5)                  | 2915      | VSTM2L   | VSTM2L (V-set     | 128434 |           |                 |        |
| GRM6      | GRM6 (glutamate receptor, metabotropic 6)                  | 2916      | VWC2L    | VWC2L (von W      | 402117 |           |                 |        |
| GRM7      | GRM7 (glutamate receptor, metabotropic 7)                  | 2917      | WDR55    | WDR55 (WDR re     | 54853  |           |                 |        |
| GRN       | GRN (granulin)                                             | 2896      | WNK2     | WNK2 (WNK ly      | 65268  |           |                 |        |
| GRPEL2    | GRPEL2 (Grpel-like 2, mitochondrial (E. coli))             | 134266    | WNT9A    | WNT9A (wingleg    | 7483   |           |                 |        |
| GRSF1     | GRSF1 (G-rich RNA sequence binding factor 1)               | 2926      | WT1      | WT1 (Wilms tu     | 7490   |           |                 |        |
| GRWD1     | GRWD1 (glutamate-rich WD repeat containing 1)              | 83743     | WWC1     | WWC1 (WW ar       | 23286  |           |                 |        |
| GSC       | GSC (goosecoid homeobox)                                   | 145258    | YARS2    | YARS2 (tyrosyl-   | 51067  |           |                 |        |
| GSDMA     | GSDMA (gasdermin A)                                        | 284110    | YIPF5    | YIPF5 (Yip1 dor   | 81555  |           |                 |        |
| GSE1      | GSE1 (Gse1 coiled-coil protein)                            | 23199     | YPEL4    | YPEL4 (yippee-l   | 219539 |           |                 |        |
| GSG1      | GSG1 (germ cell associated 1)                              | 83445     | YWHAH    | YWHAH (tyrosil    | 7533   |           |                 |        |
| SG1L      | SG1L (SGS1-like)                                           | 146395    | ZBTB4    | ZBTB4 (zinc fin   | 57659  |           |                 |        |
| GSK3B     | GSK3B (glycogen synthase kinase 3 beta)                    | 2932      | ZBTB44   | ZBTB44 (zinc fi   | 29068  |           |                 |        |
| GSKIP     | GSKIP (GSK3B interacting protein)                          | 51527     | ZBTB47   | ZBTB47 (zinc fi   | 92999  |           |                 |        |
| GSN       | GSN (gelsolin)                                             | 2934      | ZBTB8A   | ZBTB8A (zinc fi   | 653121 |           |                 |        |
| GSPT1     | GSPT1 (G1 to S phase transition 1)                         | 2935      | ZC3H7B   | ZC3H7B (zinc fi   | 23264  |           |                 |        |
| GSPT2     | GSPT2 (G1 to S phase transition 2)                         | 23708     | ZER1     | ZER1 (zyg-11 re   | 10444  |           |                 |        |
| GSR       | GSR (glutathione reductase)                                | 2936      | ZFAT     | ZFAT (zinc fing   | 57623  |           |                 |        |
| GSS       | GSS (glutathione synthetase)                               | 2937      | ZFP41    | ZFP41 (ZFP41 z    | 286128 |           |                 |        |
| GSTCD     | GSTCD (glutathione S-transferase, C-terminal domain co     | 79807     | ZIK1     | ZIK1 (zinc flinge | 284307 |           |                 |        |
| GSTK1     | GSTK1 (glutathione S-transferase kappa 1)                  | 373156    | ZMIZ1    | ZMIZ1 (zinc fin   | 57178  |           |                 |        |
| GSTM3     | GSTM3 (glutathione S-transferase mu 3 (brain))             | 2947      | ZMYND11  | ZMYND11 (zinc     | 10771  |           |                 |        |
| GSTM4     | GSTM4 (glutathione S-transferase mu 4)                     | 2948      | ZNF226   | ZNF226 (zinc fi   | 7769   |           |                 |        |
| GSTO2     | GSTO2 (glutathione S-transferase omega 2)                  | 119391    | ZNF282   | ZNF282 (zinc fi   | 8427   |           |                 |        |
| GTDCl     | GTDCl (glycosyltransferase-like domain containing 1)       | 79712     | ZNF354C  | ZNF354C (zinc f   | 30832  |           |                 |        |
| GTFA1     | GTFA1 (general transcription factor IIA, 1, 19/37kDa)      | 2957      | ZNF385A  | ZNF385A (zinc f   | 25946  |           |                 |        |
| GTFA2     | GTFA2 (general transcription factor IIA, 2, 12kDa)         | 2958      | ZNF394   | ZNF394 (zinc fi   | 84124  |           |                 |        |
| GTf2B     | GTf2B (general transcription factor IIB)                   | 2959      | ZNF444   | ZNF444 (zinc fi   | 55311  |           |                 |        |
| GTf2E1    | GTf2E1 (general transcription factor IIE, polypeptide 1, i | 2960      | ZNF584   | ZNF584 (zinc fi   | 201514 |           |                 |        |
| GTf2H1    | GTf2H1 (general transcription factor IIH, polypeptide 1,   | 2965      | ZNF607   | ZNF607 (zinc fi   | 84775  |           |                 |        |
| GTf2H2    | GTf2H2 (general transcription factor IIH, polypeptide 2,   | 2966      | ZNF74    | ZNF74 (zinc fin   | 7625   |           |                 |        |
| GTf2I     | GTf2I (general transcription factor III)                   | 2969      | ZRANB1   | ZRANB1 (zinc fi   | 54764  |           |                 |        |
| GTf2IRD2  | GTf2IRD2 (GTf2I repeat domain containing 2)                | 84163     | ABCA12   | ABCA12 (ATP-b     | 26154  |           |                 |        |
| GTf3C2    | GTf3C2 (general transcription factor IIIC, polypeptide 2,  | 2976      | ABHD15   | ABHD15 (abhy      | 116236 |           |                 |        |
| GTf3C4    | GTf3C4 (general transcription factor IIIC, polypeptide 4,  | 9329      | ABL1     | ABL1 (ABL prot    | 25     |           |                 |        |
| GTfBP1    | GTfBP1 (GTP binding protein 1)                             | 9567      | ACBD5    | ACBD5 (acyl-Co    | 91452  |           |                 |        |
| GTfBP10   | GTfBP10 (GTP-binding protein 10 (putative))                | 85865     | ACER2    | ACER2 (alkaline   | 340485 |           |                 |        |
| GTfBP2    | GTfBP2 (GTP-binding protein 2)                             | 54676     | ACTA1    | ACTA1 (actin, a   | 58     |           |                 |        |
| GTfBP8    | GTfBP8 (GTP-binding protein 8 (putative))                  | 29083     | ADA      | ADA (adenosin     | 100    |           |                 |        |
| GUCD1     | GUCD1 (guanylyl cyclase domain containing 1)               | 83606     | ADAM10   | ADAM10 (ADAI      | 102    |           |                 |        |
| GUCY1A2   | GUCY1A2 (guanylate cyclase 1, soluble, alpha 2)            | 2977      | ADD3     | ADD3 (adducin     | 120    |           |                 |        |

|         |                                                            |        |
|---------|------------------------------------------------------------|--------|
| GUCY1A3 | GUCY1A3 (guanylate cyclase 1, soluble, alpha 3)            | 2982   |
| GUCY1B3 | GUCY1B3 (guanylate cyclase 1, soluble, beta 3)             | 2983   |
| GUF1    | GUF1 (GUF1 homolog, GTPase)                                | 60558  |
| GULP1   | GULP1 (GULP, engulfment adaptor PTB domain containi        | 51454  |
| GXYLT1  | GXYLT1 (glucoside xylosyltransferase 1)                    | 283464 |
| GXYLT2  | GXYLT2 (glucoside xylosyltransferase 2)                    | 727936 |
| GYG1    | GYG1 (glycogenin 1)                                        | 2992   |
| GYG2    | GYG2 (glycogenin 2)                                        | 8908   |
| GYTL1B  | GYTL1B (glycosyltransferase-like 1B)                       | 120071 |
| GYP A   | GYP A (glycophorin A (MNS blood group))                    | 2993   |
| GS1     | GS1 (glycogen synthase 1 (muscle))                         | 2997   |
| GZF1    | GZF1 (GDNF-inducible zinc finger protein 1)                | 64412  |
| GZMB    | GZMB (granzyme B (granzyme 2, cytotoxic T-lymphocyt        | 3002   |
| GZMK    | GZMK (granzyme K (granzyme 3; trypsin II))                 | 3003   |
| H1FO    | H1FO (H1 histone family, member O)                         | 3005   |
| H2AFV   | H2AFV (H2A histone family, member V)                       | 94239  |
| H2AFX   | H2AFX (H2A histone family, member X)                       | 3014   |
| H2AFY   | H2AFY (H2A histone family, member Y)                       | 9555   |
| H2AFZ   | H2AFZ (H2A histone family, member Z)                       | 3015   |
| H3FA    | H3FA (H3 histone, family 3A)                               | 3020   |
| H3FB    | H3FB (H3 histone, family 3B (H3.3B))                       | 3021   |
| H3FC    | H3FC (H3 histone, family 3C)                               | 440093 |
| H6PD    | H6PD (hexose-6-phosphate dehydrogenase (glucose 1-d        | 9563   |
| HABP2   | HABP2 (hyaluronan binding protein 2)                       | 3026   |
| HABP4   | HABP4 (hyaluronan binding protein 4)                       | 22927  |
| HACE1   | HACE1 (HECT domain and ankyrin repeat containing E3 i      | 57531  |
| HADH    | HADH (hydroxyacyl-CoA dehydrogenase)                       | 3033   |
| HADHA   | HADHA (hydroxyacyl-CoA dehydrogenase/3-ketoacyl-Co         | 3030   |
| HAL     | HAL (histidine ammonia-lyase)                              | 3034   |
| HAND1   | HAND1 (heart and neural crest derivatives expressed 1)     | 9421   |
| HAND2   | HAND2 (heart and neural crest derivatives expressed 2)     | 9464   |
| HAO1    | HAO1 (hydroxyacid oxidase (glycolate oxidase) 1)           | 54363  |
| HAP1    | HAP1 (huntingtin-associated protein 1)                     | 9001   |
| HAPLN1  | HAPLN1 (hyaluronan and proteoglycan link protein 1)        | 1404   |
| HAPLN2  | HAPLN2 (hyaluronan and proteoglycan link protein 2)        | 60484  |
| HAPLN4  | HAPLN4 (hyaluronan and proteoglycan link protein 4)        | 404037 |
| HARBI1  | HARBI1 (harbinger transposase derived 1)                   | 283254 |
| HARS    | HARS (histidyl-tRNA synthetase)                            | 3035   |
| HAS2    | HAS2 (hyaluronan synthase 2)                               | 3037   |
| HAS3    | HAS3 (hyaluronan synthase 3)                               | 3038   |
| HAT1    | HAT1 (histone acetyltransferase 1)                         | 8520   |
| HAUS3   | HAUS3 (HAUS augmin-like complex, subunit 3)                | 79441  |
| HAUS6   | HAUS6 (HAUS augmin-like complex, subunit 6)                | 54801  |
| HAUS8   | HAUS8 (HAUS augmin-like complex, subunit 8)                | 93323  |
| HAVCR1  | HAVCR1 (hepatitis A virus cellular receptor 1)             | 26762  |
| HBEFG   | HBEFG (heparin-binding EGF-like growth factor)             | 1839   |
| HBP1    | HBP1 (HMG-box transcription factor 1)                      | 26959  |
| HCAR2   | HCAR2 (hydroxycarboxylic acid receptor 2)                  | 338442 |
| HCAH3   | HCAH3 (hydroxycarboxylic acid receptor 3)                  | 8843   |
| HCFC1   | HCFC1 (host cell factor C1)                                | 3054   |
| HCFC2   | HCFC2 (host cell factor C2)                                | 29915  |
| HCN1    | HCN1 (hyperpolarization activated cyclic nucleotide gat    | 348980 |
| HCN2    | HCN2 (hyperpolarization activated cyclic nucleotide gat    | 610    |
| HCN3    | HCN3 (hyperpolarization activated cyclic nucleotide gat    | 57657  |
| HCN4    | HCN4 (hyperpolarization activated cyclic nucleotide gat    | 10021  |
| HCRT    | HCRT (hypocretin (orexin) neuropeptide precursor)          | 3060   |
| HDAC2   | HDAC2 (histone deacetylase 2)                              | 3066   |
| HDAC4   | HDAC4 (histone deacetylase 4)                              | 9759   |
| HDAC5   | HDAC5 (histone deacetylase 5)                              | 10014  |
| HDAC7   | HDAC7 (histone deacetylase 7)                              | 51564  |
| HDAC9   | HDAC9 (histone deacetylase 9)                              | 9734   |
| HDC     | HDC (histidine decarboxylase)                              | 3067   |
| HDDC2   | HDDC2 (HD domain containing 2)                             | 51020  |
| HDDC3   | HDDC3 (HD domain containing 3)                             | 374659 |
| HDF     | HDF (hepatoma-derived growth factor)                       | 3068   |
| HDGFRP3 | HDGFRP3 (hepatoma-derived growth factor, related pro       | 50810  |
| HDHD2   | HDHD2 (haloacid dehalogenase-like hydrolase domain c       | 84064  |
| HDLBP   | HDLBP (high density lipoprotein binding protein)           | 3069   |
| HDX     | HDX (highly divergent homeobox)                            | 139324 |
| HEATR1  | HEATR1 (HEAT repeat containing 1)                          | 55127  |
| HEATR3  | HEATR3 (HEAT repeat containing 3)                          | 55027  |
| HEATR5A | HEATR5A (HEAT repeat containing 5A)                        | 25938  |
| HEATR6  | HEATR6 (HEAT repeat containing 6)                          | 63897  |
| HEBP2   | HEBP2 (heme binding protein 2)                             | 23593  |
| HECA    | HECA (hdc homolog, cell cycle regulator)                   | 51696  |
| HECTD1  | HECTD1 (HECT domain containing E3 ubiquitin protein li     | 25831  |
| HECTD2  | HECTD2 (HECT domain containing E3 ubiquitin protein li     | 143279 |
| HECTD3  | HECTD3 (HECT domain containing E3 ubiquitin protein li     | 79654  |
| HECTD4  | HECTD4 (HECT domain containing E3 ubiquitin protein li     | 283450 |
| HECW1   | HECW1 (HECT, C2 and WW domain containing E3 ubiqui         | 23072  |
| HECW2   | HECW2 (HECT, C2 and WW domain containing E3 ubiqui         | 57520  |
| HEG1    | HEG1 (heart development protein with EGF-like domain       | 57493  |
| HELLS   | HELLS (helicase, lymphoid-specific)                        | 3070   |
| HELZ    | HELZ (helicase with zinc finger)                           | 9931   |
| HELZ2   | HELZ2 (helicase with zinc finger 2, transcriptional coacti | 85441  |
| HEMK1   | HEMK1 (HemK methyltransferase family member 1)             | 51409  |

|              |                  |           |
|--------------|------------------|-----------|
| AEN          | AEN (apoptosis   | 64782     |
| AFAP1L2      | AFAP1L2 (actin   | 84632     |
| AGFG2        | AGFG2 (ArfGAF    | 3268      |
| ALDH5A1      | ALDH5A1 (alde    | 7915      |
| ALX1         | ALX1 (ALX hom    | 8092      |
| ANGEL2       | ANGEL2 (angel    | 90806     |
| ANK2         | ANK2 (ankyrin :  | 287       |
| ANKRD65      | ANKRD65 (ank     | 441869    |
| AP2A2        | AP2A2 (adapto    | 161       |
| AP2M1        | AP2M1 (adapt     | 1173      |
| AP4E1        | AP4E1 (adaptor   | 23431     |
| APOLD1       | APOLD1 (apolil   | 81575     |
| AQP10        | AQP10 (aquap     | 89872     |
| ARHGAP12     | ARHGAP12 (Rh     | 94134     |
| ARHGAP5      | ARHGAP5 (Rh      | 394       |
| ARID1B       | ARID1B (AT ric   | 57492     |
| ARIH2        | ARIH2 (ariadne   | 10425     |
| ARMCS        | ARMCS (armad     | 79798     |
| ARNT2        | ARNT2 (aryl-hy   | 9915      |
| ARSG         | ARSG (arylsulfa  | 22901     |
| ASB6         | ASB6 (ankyrin r  | 140459    |
| ASCC1        | ASCC1 (activat   | 51008     |
| ATF7IP2      | ATF7IP2 (activa  | 80063     |
| ATG4B        | ATG4B (autoph    | 23192     |
| ATL2         | ATL2 (atlastin C | 64225     |
| ATP2A2       | ATP2A2 (ATPase   | 488       |
| ATP9A        | ATP9A (ATPase    | 10079     |
| ATXN7L3      | ATXN7L3 (ataxi   | 56970     |
| ATXN7L3B     | ATXN7L3B (ata    | 552889    |
| B3GALNT1     | B3GALNT1 (bet    | 8706      |
| B4GALT4      | B4GALT4 (UDP-    | 8702      |
| BAK1         | BAK1 (BCL2-anf   | 578       |
| BAP1         | BAP1 (BRCA1 A    | 8314      |
| BCL2         | BCL2 (B-cell CLI | 596       |
| BCL2L12      | BCL2L12 (BCL2-   | 83596     |
| BCL2L2-PABPN | BCL2L2-PABPN     | 100529063 |
| BRPF3        | BRPF3 (bromoc    | 27154     |
| BTN3A2       | BTN3A2 (butyr    | 11118     |
| C10orf76     | C10orf76 (chro   | 79591     |
| C17orf49     | C17orf49 (chro   | 124944    |
| C19orf47     | C19orf47 (chro   | 126526    |
| C1orf226     | C1orf226 (chro   | 400793    |
| C2orf49      | C2orf49 (chron   | 79074     |
| C5orf30      | C5orf30 (chron   | 90355     |
| C6orf106     | C6orf106 (chro   | 64771     |
| C9orf114     | C9orf114 (chro   | 51490     |
| C9orf156     | C9orf156 (chro   | 51531     |
| CABLES1      | CABLES1 (Cdk5    | 91768     |
| CABP7        | CABP7 (calcium   | 164633    |
| CACNG1       | CACNG1 (calciu   | 786       |
| CAMKK1       | CAMKK1 (calciu   | 84254     |
| CAMKV        | CAMKV (CaM k     | 79012     |
| CAP1         | CAP1 (CAP, ade   | 10487     |
| CAPRIN1      | CAPRIN1 (cell c  | 4076      |
| CAPRIN2      | CAPRIN2 (capri   | 65981     |
| CAPZB        | CAPZB (capping   | 832       |
| CASD1        | CASD1 (CASI d    | 64921     |
| CBX6         | CBX6 (chromot    | 23466     |
| CCDC179      | CCDC179 (coile   | 100500938 |
| CCDC25       | CCDC25 (coiled   | 55246     |
| CCDC88C      | CCDC88C (coile   | 440193    |
| CCDC97       | CCDC97 (coiled   | 90324     |
| CCER1        | CCER1 (coiled-c  | 196477    |
| CCS          | CCS (copper ch   | 9973      |
| CD274        | CD274 (CD274     | 29126     |
| CDCSL        | CDCSL (cell divi | 988       |
| CD7          | CD7 (cell divis  | 8317      |
| CDH18        | CDH18 (cadher    | 1016      |
| CECR6        | CECR6 (cat eye   | 27439     |
| CELF1        | CELF1 (CUGBP,    | 10658     |
| CENPC        | CENPC (centror   | 1060      |
| CENPO        | CENPO (centro    | 79172     |
| CEP170       | CEP170 (centro   | 9859      |
| CHD8         | CHD8 (chromos    | 57680     |
| CHL1         | CHL1 (cell adhe  | 10752     |
| CHN1         | CHN1 (chimerir   | 1123      |
| CHRNA5       | CHRNA5 (cholin   | 1138      |
| CIC          | CIC (capicua tr  | 23152     |
| CISD3        | CISD3 (COGSH i   | 284106    |
| CLDN1        | CLDN1 (claudin   | 9076      |
| CLEC16A      | CLEC16A (C-type  | 23274     |
| CLEC2L       | CLEC2L (C-type   | 154790    |
| CLTC         | CLTC (clathrin,  | 1213      |
| CMTR1        | CMTR1 (cap m     | 23070     |
| CNNM2        | CNNM2 (cyclin    | 54805     |
| CNNM3        | CNNM3 (cyclin    | 26505     |

|            |                                                           |        |          |                   |        |
|------------|-----------------------------------------------------------|--------|----------|-------------------|--------|
| HEPACAM    | HEPACAM (hepatic and glial cell adhesion molecule)        | 220296 | COA5     | COA5 (cytochr     | 493753 |
| HEPHL1     | HEPHL1 (hephaestin-like 1)                                | 341208 | COL7A1   | COL7A1 (collag    | 1294   |
| HERC2      | HERC2 (HECT and RLD domain containing E3 ubiquitin p      | 8924   | COLQ     | COLQ (collagen    | 8292   |
| HERC3      | HERC3 (HECT and RLD domain containing E3 ubiquitin p      | 8916   | CPE      | CPE (carboxype    | 1363   |
| HERC4      | HERC4 (HECT and RLD domain containing E3 ubiquitin p      | 26091  | CPSF6    | CPSF6 (cleavag    | 11052  |
| HERPUD1    | HERPUD1 (homocysteine-inducible, endoplasmic reticul      | 9709   | CRISPLD2 | CRISPLD2 (cyst    | 83716  |
| HERPUD2    | HERPUD2 (HERPUD family member 2)                          | 64224  | CSE1L    | CSE1L (CSE1 ch    | 1434   |
| HE51       | HE51 (hes family bHLH transcription factor 1)             | 3280   | CTNNBL1  | CTNNBL1 (cate     | 56259  |
| HE57       | HE57 (hes family bHLH transcription factor 7)             | 84667  | CTSW     | CTSW (catheps     | 1521   |
| HEXIM1     | HEXIM1 (hexamethylene bis-acetamide inducible 1)          | 10614  | CUL2     | CUL2 (cullin 2)   | 8453   |
| HEY1       | HEY1 (hes-related family bHLH transcription factor with   | 23462  | CXCR4    | CXCR4 (chemol     | 7852   |
| HEY2       | HEY2 (hes-related family bHLH transcription factor with   | 23493  | CXCR5    | CXCR5 (chemol     | 643    |
| HEYL       | HEYL (hes-related family bHLH transcription factor with   | 26508  | CYB561   | CYB561 (cytoch    | 1534   |
| HFE        | HFE (hemochromatosis)                                     | 3077   | CYLC1    | CYLC1 (cylicin, I | 1538   |
| HGF        | HGF (hepatocyte growth factor (hepapoietin A; scatter f   | 3082   | CYTH3    | CYTH3 (cytohe     | 9265   |
| HGS        | HGS (hepatocyte growth factor-regulated tyrosine kinas    | 9146   | DAAM1    | DAAM1 (dishes     | 23002  |
| HHEX       | HHEX (hematopoietically expressed homeobox)               | 3087   | DAND5    | DAND5 (DAN d      | 196699 |
| HHIP       | HHIP (hedgehog interacting protein)                       | 64399  | DAZ2     | DAZ2 (deleted     | 57135  |
| HHIPL1     | HHIPL1 (HHIP-like 1)                                      | 84439  | DAZAP2   | DAZAP2 (DAZ a     | 9802   |
| HLA1       | HLA1 (HERV-H LTR-associating 1)                           | 10086  | DBNL     | DBNL (drebrin-    | 28988  |
| HLA2       | HLA2 (HERV-H LTR-associating 2)                           | 11148  | DBP      | DBP (D site of a  | 1628   |
| HIAT1      | HIAT1 (hippocampus abundant transcript 1)                 | 64645  | DCTN5    | DCTN5 (dynact     | 84516  |
| HIATL1     | HIATL1 (hippocampus abundant transcript-like 1)           | 84641  | DDN      | DDN (dendrin)     | 23109  |
| HIBADH     | HIBADH (3-hydroxyisobutyrate dehydrogenase)               | 11112  | DDX11    | DDX11 (DEAD/I     | 1663   |
| HIC1       | HIC1 (hypermethylated in cancer 1)                        | 3090   | DDX19B   | DDX19B (DEAD      | 11269  |
| HIC2       | HIC2 (hypermethylated in cancer 2)                        | 23119  | DDX27    | DDX27 (DEAD (     | 55661  |
| HIF1A      | HIF1A (hypoxia inducible factor 1, alpha subunit (basic h | 3091   | DDX42    | DDX42 (DEAD (     | 11325  |
| HIF1AN     | HIF1AN (hypoxia inducible factor 1, alpha subunit inhibi  | 55662  | DDX52    | DDX52 (DEAD (     | 11056  |
| HIF3A      | HIF3A (hypoxia inducible factor 3, alpha subunit)         | 64344  | DEF6     | DEF6 (DEF6 gu     | 50619  |
| HIGD1A     | HIGD1A (HIG1 hypoxia inducible domain family, membe       | 25994  | DGKG     | DGKG (diacylgh    | 1608   |
| HILPDA     | HILPDA (hypoxia inducible lipid droplet-associated)       | 29923  | DIP2A    | DIP2A (disco-in   | 23181  |
| HINFP      | HINFP (histone H4 transcription factor)                   | 25988  | DNAJB1   | DNAJB1 (DnaJ (    | 3337   |
| HINT1      | HINT1 (histidine triad nucleotide binding protein 1)      | 3094   | DNAJC1   | DNAJC1 (DnaJ (    | 64215  |
| HINT3      | HINT3 (histidine triad nucleotide binding protein 3)      | 135114 | DNAJC5   | DNAJC5 (DnaJ (    | 80331  |
| HIP1       | HIP1 (huntingtin interacting protein 1)                   | 3092   | DNM1     | DNM1 (dynami      | 1759   |
| HIP1R      | HIP1R (huntingtin interacting protein 1 related)          | 9026   | DNM1L    | DNM1L (dynarr     | 10059  |
| HIPK1      | HIPK1 (homeodomain interacting protein kinase 1)          | 204851 | DOCK7    | DOCK7 (dedicai    | 85440  |
| HIPK3      | HIPK3 (homeodomain interacting protein kinase 3)          | 10114  | DOCK9    | DOCK9 (dedicai    | 23348  |
| HIST1H1B   | HIST1H1B (histone cluster 1, H1b)                         | 3009   | DPYSL3   | DPYSL3 (dihydr    | 1809   |
| HIST1H1C   | HIST1H1C (histone cluster 1, H1c)                         | 3006   | DUSP2    | DUSP2 (dual sp    | 1844   |
| HIST1H1D   | HIST1H1D (histone cluster 1, H1d)                         | 3007   | DYNLL2   | DYNLL2 (dyneir    | 140735 |
| HIST1H1E   | HIST1H1E (histone cluster 1, H1e)                         | 3008   | E2F7     | E2F7 (E2F trans   | 144455 |
| HIST1H2AA  | HIST1H2AA (histone cluster 1, H2aa)                       | 221613 | EFR3B    | EFR3B (EFR3 hc    | 22979  |
| HIST1H2AB  | HIST1H2AB (histone cluster 1, H2ab)                       | 8335   | EGLN3    | EGLN3 (egl-9 fa   | 112399 |
| HIST1H2AD  | HIST1H2AD (histone cluster 1, H2ad)                       | 3013   | EHD4     | EHD4 (EH-dom-     | 30844  |
| HIST1H2AE  | HIST1H2AE (histone cluster 1, H2ae)                       | 3012   | ELAVL3   | ELAVL3 (ELAV li   | 1995   |
| HIST1H2AH  | HIST1H2AH (histone cluster 1, H2ah)                       | 85235  | ELMO1    | ELMO1 (enguffi    | 9844   |
| HIST1H2AI  | HIST1H2AI (histone cluster 1, H2ai)                       | 8329   | EMC8     | EMC8 (EP mem      | 10328  |
| HIST1H2AJ  | HIST1H2AJ (histone cluster 1, H2aj)                       | 8331   | EPHA4    | EPHA4 (EPH re     | 2043   |
| HIST1H2AK  | HIST1H2AK (histone cluster 1, H2ak)                       | 8330   | EPOR     | EPOR (erythro     | 2057   |
| HIST1H2AM  | HIST1H2AM (histone cluster 1, H2am)                       | 8336   | ERBB2    | ERBB2 (erb-b2     | 2064   |
| HIST1H2BB  | HIST1H2BB (histone cluster 1, H2bb)                       | 3018   | EXOSC7   | EXOSC7 (exoso     | 23016  |
| HIST1H2BD  | HIST1H2BD (histone cluster 1, H2bd)                       | 3017   | EZH1     | EZH1 (enhance     | 2145   |
| HIST1H2BE  | HIST1H2BE (histone cluster 1, H2be)                       | 8344   | FAIM     | FAIM (Fas apoc    | 55179  |
| HIST1H2BF  | HIST1H2BF (histone cluster 1, H2bf)                       | 8343   | FAM110D  | FAM110D (fam      | 79927  |
| HIST1H2BG  | HIST1H2BG (histone cluster 1, H2bg)                       | 8339   | FAM19A1  | FAM19A1 (fam      | 407738 |
| HIST1H2BH  | HIST1H2BH (histone cluster 1, H2bh)                       | 8345   | FAM20C   | FAM20C (famil     | 56975  |
| HIST1H2BI  | HIST1H2BI (histone cluster 1, H2bi)                       | 8346   | FAM46C   | FAM46C (famil     | 54855  |
| HIST1H2BL  | HIST1H2BL (histone cluster 1, H2bl)                       | 8340   | FAM78B   | FAM78B (famil     | 149297 |
| HIST1H2BO  | HIST1H2BO (histone cluster 1, H2bo)                       | 8348   | FAM83D   | FAM83D (famil     | 81610  |
| HIST1H3A   | HIST1H3A (histone cluster 1, H3a)                         | 8350   | FAM98B   | FAM98B (famil     | 283742 |
| HIST1H3B   | HIST1H3B (histone cluster 1, H3b)                         | 8358   | FANCA    | FANCA (Fanco      | 2175   |
| HIST1H3C   | HIST1H3C (histone cluster 1, H3c)                         | 8352   | FBXL20   | FBXL20 (F-box i   | 84961  |
| HIST1H3E   | HIST1H3E (histone cluster 1, H3e)                         | 8353   | FBXO21   | FBXO21 (F-box     | 23014  |
| HIST1H3F   | HIST1H3F (histone cluster 1, H3f)                         | 8968   | FBXO33   | FBXO33 (F-box     | 254170 |
| HIST1H3G   | HIST1H3G (histone cluster 1, H3g)                         | 8355   | FBXO44   | FBXO44 (F-box     | 93611  |
| HIST1H3H   | HIST1H3H (histone cluster 1, H3h)                         | 8357   | FCGRT    | FCGRT (Fc fragr   | 2217   |
| HIST1H3I   | HIST1H3I (histone cluster 1, H3i)                         | 8354   | FCRLB    | FCRLB (Fc rece    | 127943 |
| HIST1H3J   | HIST1H3J (histone cluster 1, H3j)                         | 8356   | FGF12    | FGF12 (fibrobla   | 2257   |
| HIST2H2AA3 | HIST2H2AA3 (histone cluster 2, H2aa3)                     | 8337   | FGF13    | FGF13 (fibrobla   | 2258   |
| HIST2H2AA4 | HIST2H2AA4 (histone cluster 2, H2aa4)                     | 723790 | FGF9     | FGF9 (fibroblas   | 2254   |
| HIST2H2BE  | HIST2H2BE (histone cluster 2, H2be)                       | 8349   | FHDCl    | FHDCl (FH2 do     | 85462  |
| HIST2H2BF  | HIST2H2BF (histone cluster 2, H2bf)                       | 440689 | FHL5     | FHL5 (four and    | 9457   |
| HIST2H3A   | HIST2H3A (histone cluster 2, H3a)                         | 333932 | FMNL3    | FMNL3 (formin     | 91010  |
| HIST2H3C   | HIST2H3C (histone cluster 2, H3c)                         | 126961 | FRS1     | FRS1 (ferric-cl   | 391059 |
| HIST2H3D   | HIST2H3D (histone cluster 2, H3d)                         | 653604 | FUT11    | FUT11 (fucosyl    | 170384 |
| HIST3H2A   | HIST3H2A (histone cluster 3, H2a)                         | 92815  | FXYD6    | FXYD6 (FXYD di    | 53826  |
| HIST3H2BB  | HIST3H2BB (histone cluster 3, H2bb)                       | 128312 | G6PC2    | G6PC2 (glucose    | 57818  |
| HIST3H3    | HIST3H3 (histone cluster 3, H3)                           | 8290   | GADD45G  | GADD45G (grog     | 10912  |
| HIVEP1     | HIVEP1 (human immunodeficiency virus type I enhancer      | 3096   | GDF11    | GDF11 (growth     | 10220  |
| HIVEP2     | HIVEP2 (human immunodeficiency virus type I enhancer      | 3097   | GDNF     | GDNF (glial cell  | 2668   |
| HIVEP3     | HIVEP3 (human immunodeficiency virus type I enhancer      | 59269  | GK       | GK (glycerol kin  | 2710   |
| HK1        | HK1 (hexokinase 1)                                        | 3098   | GLG1     | GLG1 (golgi gly   | 2734   |
| HK2        | HK2 (hexokinase 2)                                        | 3099   | GLYCTK   | GLYCTK (glycer-   | 132158 |
| HK3        | HK3 (hexokinase 3 (white cell))                           | 3101   | GN4      | GN4 (guanine      | 2786   |
| HLA-DQA1   | HLA-DQA1 (major histocompatibility complex, class II, D   | 3117   | GOLPH3L  | GOLPH3L (golgi    | 55204  |

[illegible]

|            |                                                                      |           |
|------------|----------------------------------------------------------------------|-----------|
| HOXD1      | HOXD1 (homeobox D1)                                                  | 3231      |
| HOXD10     | HOXD10 (homeobox D10)                                                | 3236      |
| HOXD11     | HOXD11 (homeobox D11)                                                | 3237      |
| HOXD12     | HOXD12 (homeobox D12)                                                | 3238      |
| HOXD13     | HOXD13 (homeobox D13)                                                | 3239      |
| HOXD4      | HOXD4 (homeobox D4)                                                  | 3233      |
| HOXD8      | HOXD8 (homeobox D8)                                                  | 3234      |
| HOXD9      | HOXD9 (homeobox D9)                                                  | 3235      |
| HP1BP3     | HP1BP3 (heterochromatin protein 1, binding protein 3)                | 50809     |
| HPCAL1     | HPCAL1 (hippocalcin-like 1)                                          | 3241      |
| HPCAL4     | HPCAL4 (hippocalcin-like 4)                                          | 51440     |
| HPRT1      | HPRT1 (hypoxanthine phosphoribosyltransferase 1)                     | 3251      |
| HP33       | HP33 (Hermansky-Pudlak syndrome 3)                                   | 84343     |
| HP54       | HP54 (Hermansky-Pudlak syndrome 4)                                   | 89781     |
| HP55       | HP55 (Hermansky-Pudlak syndrome 5)                                   | 11234     |
| HPSE       | HPSE (heparanase)                                                    | 10855     |
| HPSE2      | HPSE2 (heparanase 2 (inactive))                                      | 60495     |
| HPX        | HPX (hemopexin)                                                      | 3263      |
| HR         | HR (hair growth associated)                                          | 55806     |
| HRAS       | HRAS (Harvey rat sarcoma viral oncogene homolog)                     | 3265      |
| HRCT1      | HRCT1 (histidine rich carboxyl terminus 1)                           | 646962    |
| HRH1       | HRH1 (histamine receptor H1)                                         | 3269      |
| HRH4       | HRH4 (histamine receptor H4)                                         | 59340     |
| HRK        | HRK (harakiri, BCL2 interacting protein)                             | 8739      |
| HRSP12     | HRSP12 (heat-responsive protein 12)                                  | 10247     |
| HS1BP3     | HS1BP3 (HCLS1 binding protein 3)                                     | 64342     |
| HS2ST1     | HS2ST1 (heparan sulfate 2-O-sulfotransferase 1)                      | 9653      |
| HS3ST1     | HS3ST1 (heparan sulfate (glucosamine) 3-O-sulfotransferase 1)        | 9957      |
| HS3ST2     | HS3ST2 (heparan sulfate (glucosamine) 3-O-sulfotransferase 2)        | 9956      |
| HS3ST3A1   | HS3ST3A1 (heparan sulfate (glucosamine) 3-O-sulfotransferase 3A1)    | 9955      |
| HS3ST3B1   | HS3ST3B1 (heparan sulfate (glucosamine) 3-O-sulfotransferase 3B1)    | 9953      |
| HS3ST4     | HS3ST4 (heparan sulfate (glucosamine) 3-O-sulfotransferase 4)        | 9951      |
| HS3ST5     | HS3ST5 (heparan sulfate (glucosamine) 3-O-sulfotransferase 5)        | 222537    |
| HS6ST1     | HS6ST1 (heparan sulfate 6-O-sulfotransferase 1)                      | 9394      |
| HS6ST2     | HS6ST2 (heparan sulfate 6-O-sulfotransferase 2)                      | 90161     |
| HS6ST3     | HS6ST3 (heparan sulfate 6-O-sulfotransferase 3)                      | 266722    |
| HSBP1      | HSBP1 (heat shock factor binding protein 1)                          | 3281      |
| HSD11B1    | HSD11B1 (hydroxysteroid (11-beta) dehydrogenase 1)                   | 3290      |
| HSD17B12   | HSD17B12 (hydroxysteroid (17-beta) dehydrogenase 12)                 | 51144     |
| HSD17B8    | HSD17B8 (hydroxysteroid (17-beta) dehydrogenase 8)                   | 7923      |
| HSD3B7     | HSD3B7 (hydroxy-delta-5-steroid dehydrogenase, 3 beta-)              | 80270     |
| HSDL1      | HSDL1 (hydroxysteroid dehydrogenase like 1)                          | 83693     |
| HSDL2      | HSDL2 (hydroxysteroid dehydrogenase like 2)                          | 84263     |
| HSF2       | HSF2 (heat shock transcription factor 2)                             | 3298      |
| HSF2BP     | HSF2BP (heat shock transcription factor 2 binding protein)           | 11077     |
| HSF5       | HSF5 (heat shock transcription factor family member 5)               | 124535    |
| HSH2D      | HSH2D (hematopoietic SH2 domain containing)                          | 84941     |
| HSP90AA1   | HSP90AA1 (heat shock protein 90kDa alpha (cytosolic), class A)       | 3320      |
| HSP90B1    | HSP90B1 (heat shock protein 90kDa beta (Grp94), member 1)            | 7194      |
| HSPA12A    | HSPA12A (heat shock 70kDa protein 12A)                               | 259217    |
| HSPA12B    | HSPA12B (heat shock 70kDa protein 12B)                               | 116835    |
| HSPA13     | HSPA13 (heat shock protein 70kDa family, member 13)                  | 6782      |
| HSPA2      | HSPA2 (heat shock 70kDa protein 2)                                   | 3306      |
| HSPA4      | HSPA4 (heat shock 70kDa protein 4)                                   | 3308      |
| HSPA4L     | HSPA4L (heat shock 70kDa protein 4-like)                             | 22824     |
| HSPA5      | HSPA5 (heat shock 70kDa protein 5 (glucose-regulated protein 78))    | 3309      |
| HSPA8      | HSPA8 (heat shock 70kDa protein 8)                                   | 3312      |
| HSPA9      | HSPA9 (heat shock 70kDa protein 9 (mortalin))                        | 3313      |
| HSPB3      | HSPB3 (heat shock 27kDa protein 3)                                   | 8988      |
| HSPB6      | HSPB6 (heat shock protein, alpha-crystallin-related, B6)             | 126393    |
| HSPB8      | HSPB8 (heat shock 22kDa protein 8)                                   | 26353     |
| HSPBAP1    | HSPBAP1 (HSPB (heat shock 27kDa) associated protein 1)               | 79663     |
| HSPD1      | HSPD1 (heat shock 60kDa protein 1 (chaperonin))                      | 3329      |
| HSPE1      | HSPE1 (heat shock 10kDa protein 1)                                   | 3336      |
| HSPE1-MOB4 | HSPE1-MOB4 (HSPE1-MOB4 readthrough)                                  | 100529241 |
| HSPG2      | HSPG2 (heparan sulfate proteoglycan 2)                               | 3339      |
| HSPH1      | HSPH1 (heat shock 105kDa/110kDa protein 1)                           | 10808     |
| HTATIP2    | HTATIP2 (HIV-1 Tat interactive protein 2, 30kDa)                     | 10553     |
| HTATSF1    | HTATSF1 (HIV-1 Tat specific factor 1)                                | 27336     |
| HTR1F      | HTR1F (5-hydroxytryptamine (serotonin) receptor 1F, G)               | 3355      |
| HTR2A      | HTR2A (5-hydroxytryptamine (serotonin) receptor 2A, G)               | 3356      |
| HTR2C      | HTR2C (5-hydroxytryptamine (serotonin) receptor 2C, G)               | 3358      |
| HTR6       | HTR6 (5-hydroxytryptamine (serotonin) receptor 6, G protein-coupled) | 3362      |
| HTR7       | HTR7 (5-hydroxytryptamine (serotonin) receptor 7, adrenergic)        | 3363      |
| HTRA2      | HTRA2 (HtrA serine peptidase 2)                                      | 27429     |
| HTRA3      | HTRA3 (HtrA serine peptidase 3)                                      | 94031     |
| HTT        | HTT (huntingtin)                                                     | 3064      |
| HUNK       | HUNK (hormonally up-regulated Neu-associated kinase)                 | 30811     |
| HUS1       | HUS1 (HUS1 checkpoint clamp component)                               | 3364      |
| HVCN1      | HVCN1 (hydrogen voltage gated channel 1)                             | 84329     |
| HYAL1      | HYAL1 (hyaluronoglucosaminidase 1)                                   | 3373      |
| HYI        | HYI (hydroxyisovalerate isomerase [putative])                        | 81888     |
| HYOU1      | HYOU1 (hypoxia up-regulated 1)                                       | 10525     |
| HYPK       | HYPK (huntingtin interacting protein K)                              | 25764     |
| IAH1       | IAH1 (isoamyl acetate-hydrolyzing esterase 1 homolog)                | 285148    |
| IAPP       | IAPP (islet amyloid polypeptide)                                     | 3375      |

|         |                                                            |        |
|---------|------------------------------------------------------------|--------|
| IARS    | IARS (isoleucyl-tRNA synthetase)                           | 3376   |
| IARS2   | IARS2 (isoleucyl-tRNA synthetase 2, mitochondrial)         | 55699  |
| IBA57   | IBA57 (IBA57 homolog, iron-sulfur cluster assembly)        | 200205 |
| IBSP    | IBSP (integrin-binding sialoprotein)                       | 3381   |
| IBTK    | IBTK (inhibitor of Bruton agammaglobulinemia tyrosine      | 25998  |
| ICA1    | ICA1 (islet cell autoantigen 1, 69kDa)                     | 3382   |
| ICK     | ICK (intestinal cell (MAK-like) kinase)                    | 22858  |
| ICMT    | ICMT (isoprenylcysteine carboxyl methyltransferase)        | 23463  |
| ICOS    | ICOS (inducible T-cell co-stimulator)                      | 29851  |
| ICOSLG  | ICOSLG (inducible T-cell co-stimulator ligand)             | 23308  |
| ID2     | ID2 (inhibitor of DNA binding 2, dominant negative helix   | 3398   |
| ID3     | ID3 (inhibitor of DNA binding 3, dominant negative helix   | 3399   |
| ID4     | ID4 (inhibitor of DNA binding 4, dominant negative helix   | 3400   |
| IDE     | IDE (insulin-degrading enzyme)                             | 3416   |
| IDH1    | IDH1 (isocitrate dehydrogenase 1 (NADP+), soluble)         | 3417   |
| IDH2    | IDH2 (isocitrate dehydrogenase 2 (NADP+), mitochondri      | 3418   |
| IDH3A   | IDH3A (isocitrate dehydrogenase 3 (NAD+) alpha)            | 3419   |
| IDH3G   | IDH3G (isocitrate dehydrogenase 3 (NAD+) gamma)            | 3421   |
| IDS     | IDS (iduronate 2-sulfatase)                                | 3423   |
| IDUA    | IDUA (iduronidase, alpha-L-)                               | 3425   |
| IER2    | IER2 (immediate early response 2)                          | 9592   |
| IER3    | IER3 (immediate early response 3)                          | 8870   |
| IER3IP1 | IER3IP1 (immediate early response 3 interacting protein    | 51124  |
| IER5    | IER5 (immediate early response 5)                          | 51278  |
| IER5L   | IER5L (immediate early response 5-like)                    | 389792 |
| IFFO1   | IFFO1 (intermediate filament family orphan 1)              | 25900  |
| IFFO2   | IFFO2 (intermediate filament family orphan 2)              | 126917 |
| IFIT2   | IFIT2 (interferon-induced protein with tetratricopeptide   | 3433   |
| IFIT5   | IFIT5 (interferon-induced protein with tetratricopeptide   | 24138  |
| IFITM10 | IFITM10 (interferon induced transmembrane protein 10       | 402778 |
| IFNAR1  | IFNAR1 (interferon (alpha, beta and omega) receptor 1)     | 3454   |
| IFNAR2  | IFNAR2 (interferon (alpha, beta and omega) receptor 2)     | 3455   |
| IFNE    | IFNE (interferon, epsilon)                                 | 338376 |
| IFNG    | IFNG (interferon, gamma)                                   | 3458   |
| IFNLR1  | IFNLR1 (interferon, lambda receptor 1)                     | 163702 |
| IFRD1   | IFRD1 (interferon-related developmental regulator 1)       | 3475   |
| IFT122  | IFT122 (intraflagellar transport 122)                      | 55764  |
| IFT20   | IFT20 (intraflagellar transport 20)                        | 90410  |
| IFT74   | IFT74 (intraflagellar transport 74)                        | 80173  |
| IFT80   | IFT80 (intraflagellar transport 80)                        | 57560  |
| IGDCC3  | IGDCC3 (immunoglobulin superfamily, DCC subclass, me       | 9543   |
| IGDCC4  | IGDCC4 (immunoglobulin superfamily, DCC subclass, me       | 57722  |
| IGF1    | IGF1 (insulin-like growth factor 1 (somatomedin C))        | 3479   |
| IGF1R   | IGF1R (insulin-like growth factor 1 receptor)              | 3480   |
| IGF2    | IGF2 (insulin-like growth factor 2)                        | 3481   |
| IGF2BP1 | IGF2BP1 (insulin-like growth factor 2 mRNA binding prot    | 10642  |
| IGF2BP2 | IGF2BP2 (insulin-like growth factor 2 mRNA binding prot    | 10644  |
| IGF2BP3 | IGF2BP3 (insulin-like growth factor 2 mRNA binding prot    | 10643  |
| IGF2R   | IGF2R (insulin-like growth factor 2 receptor)              | 3482   |
| IGFBP3  | IGFBP3 (insulin-like growth factor binding protein 3)      | 3486   |
| IGFBP4  | IGFBP4 (insulin-like growth factor binding protein 4)      | 3487   |
| IGFBP5  | IGFBP5 (insulin-like growth factor binding protein 5)      | 3488   |
| IGFBPL1 | IGFBPL1 (insulin-like growth factor binding protein-like 1 | 347252 |
| IGFN1   | IGFN1 (immunoglobulin-like and fibronectin type III dom    | 91156  |
| IGIP    | IGIP (IgA-inducing protein)                                | 492311 |
| IGLON5  | IGLON5 (IgLON family member 5)                             | 402665 |
| IGSF1   | IGSF1 (immunoglobulin superfamily, member 1)               | 3547   |
| IGSF10  | IGSF10 (immunoglobulin superfamily, member 10)             | 285313 |
| IGSF11  | IGSF11 (immunoglobulin superfamily, member 11)             | 152404 |
| IGSF3   | IGSF3 (immunoglobulin superfamily, member 3)               | 3321   |
| IGSF5   | IGSF5 (immunoglobulin superfamily, member 5)               | 150084 |
| IGSF6   | IGSF6 (immunoglobulin superfamily, member 6)               | 10261  |
| IGSF9B  | IGSF9B (immunoglobulin superfamily, member 9B)             | 22997  |
| IHH     | IHH (indian hedgehog)                                      | 3549   |
| IK      | IK (IK cytokine, down-regulator of HLA II)                 | 3550   |
| IKBIP   | IKBIP (IKKB interacting protein)                           | 121457 |
| IKBKAP  | IKBKAP (inhibitor of kappa light polypeptide gene enhan    | 8518   |
| IKKB    | IKKB (inhibitor of kappa light polypeptide gene enhanc     | 3551   |
| IKBE    | IKBE (inhibitor of kappa light polypeptide gene enhanc     | 9641   |
| IKBKG   | IKBKG (inhibitor of kappa light polypeptide gene enhanc    | 8517   |
| IKZF1   | IKZF1 (IKAROS family zinc finger 1 (Ikaros))               | 10320  |
| IKZF2   | IKZF2 (IKAROS family zinc finger 2 (Helios))               | 22807  |
| IKZF3   | IKZF3 (IKAROS family zinc finger 3 (Aiolos))               | 22806  |
| IKZF4   | IKZF4 (IKAROS family zinc finger 4 (Eos))                  | 64375  |
| IKZF5   | IKZF5 (IKAROS family zinc finger 5 (Pegasus))              | 64376  |
| IL10RA  | IL10RA (interleukin 10 receptor, alpha)                    | 3587   |
| IL10RB  | IL10RB (interleukin 10 receptor, beta)                     | 3588   |
| IL11    | IL11 (interleukin 11)                                      | 3589   |
| IL13    | IL13 (interleukin 13)                                      | 3596   |
| IL13RA1 | IL13RA1 (interleukin 13 receptor, alpha 1)                 | 3597   |
| IL15    | IL15 (interleukin 15)                                      | 3600   |
| IL16    | IL16 (interleukin 16)                                      | 3603   |
| IL17A   | IL17A (interleukin 17A)                                    | 3605   |
| IL17RB  | IL17RB (interleukin 17 receptor B)                         | 55540  |
| IL17RD  | IL17RD (interleukin 17 receptor D)                         | 54756  |
| IL17RE  | IL17RE (interleukin 17 receptor E)                         | 132014 |

|             |                                                                         |           |
|-------------|-------------------------------------------------------------------------|-----------|
| IL18BP      | IL18BP (interleukin 18 binding protein)                                 | 10068     |
| IL1A        | IL1A (interleukin 1, alpha)                                             | 3552      |
| IL1R1       | IL1R1 (interleukin 1 receptor, type I)                                  | 3554      |
| IL1RAP      | IL1RAP (interleukin 1 receptor accessory protein)                       | 3556      |
| IL1RAPL1    | IL1RAPL1 (interleukin 1 receptor accessory protein-like 1)              | 11141     |
| IL1RN       | IL1RN (interleukin 1 receptor antagonist)                               | 3557      |
| IL2         | IL2 (interleukin 2)                                                     | 3558      |
| IL21R       | IL21R (interleukin 21 receptor)                                         | 50615     |
| IL22RA2     | IL22RA2 (interleukin 22 receptor, alpha 2)                              | 116379    |
| IL25        | IL25 (interleukin 25)                                                   | 64806     |
| IL2RB       | IL2RB (interleukin 2 receptor, beta)                                    | 3560      |
| IL5RA       | IL5RA (interleukin 5 receptor, alpha)                                   | 3568      |
| IL6         | IL6 (interleukin 6)                                                     | 3569      |
| IL6R        | IL6R (interleukin 6 receptor)                                           | 3570      |
| IL6ST       | IL6ST (interleukin 6 signal transducer)                                 | 3572      |
| IL7         | IL7 (interleukin 7)                                                     | 3574      |
| IL7R        | IL7R (interleukin 7 receptor)                                           | 3575      |
| ILDR1       | ILDR1 (immunoglobulin-like domain containing receptor)                  | 286676    |
| ILDR2       | ILDR2 (immunoglobulin-like domain containing receptor)                  | 387597    |
| ILF3        | ILF3 (interleukin enhancer binding factor 3, 90kDa)                     | 3609      |
| ILK         | ILK (integrin-linked kinase)                                            | 3611      |
| ILKAP       | ILKAP (integrin-linked kinase-associated serine/threonine kinase)       | 80895     |
| ILVBL       | ILVBL (ilvB (bacterial acetolactate synthase)-like)                     | 10994     |
| IMMT        | IMMT (inner membrane protein, mitochondrial)                            | 10989     |
| IMPA1       | IMPA1 (inositol(myo)-1(or 4)-monophosphatase 1)                         | 3612      |
| IMPA2       | IMPA2 (inositol(myo)-1(or 4)-monophosphatase 2)                         | 3613      |
| IMPACT      | IMPACT (impact RWD domain protein)                                      | 55364     |
| IMPAD1      | IMPAD1 (inositol monophosphatase domain containing)                     | 54928     |
| IMPDH1      | IMPDH1 (IMP (inosine 5'-monophosphate) dehydrogenase)                   | 3614      |
| IMPG1       | IMPG1 (interphotoreceptor matrix proteoglycan 1)                        | 3617      |
| IMPG2       | IMPG2 (interphotoreceptor matrix proteoglycan 2)                        | 50939     |
| INA         | INA (internexin neuronal intermediate filament protein, alpha)          | 9118      |
| INADL       | INADL (InaD-like (Drosophila))                                          | 10207     |
| INF2        | INF2 (inverted formin, FH2 and WH2 domain containing)                   | 64423     |
| ING1        | ING1 (inhibitor of growth family, member 1)                             | 3621      |
| ING2        | ING2 (inhibitor of growth family, member 2)                             | 3622      |
| ING5        | ING5 (inhibitor of growth family, member 5)                             | 84289     |
| INHBA       | INHBA (inhibin, beta A)                                                 | 3624      |
| INHBB       | INHBB (inhibin, beta B)                                                 | 3625      |
| INHBC       | INHBC (inhibin, beta C)                                                 | 3626      |
| INHBE       | INHBE (inhibin, beta E)                                                 | 83729     |
| INIP        | INIP (INTS3 and NABP interacting protein)                               | 58493     |
| INO80       | INO80 (INO80 complex subunit)                                           | 54617     |
| INO80C      | INO80C (INO80 complex subunit C)                                        | 125476    |
| INO80D      | INO80D (INO80 complex subunit D)                                        | 54891     |
| INPP4A      | INPP4A (inositol polyphosphate-4-phosphatase type I A)                  | 3631      |
| INPP5A      | INPP5A (inositol polyphosphate-5-phosphatase A)                         | 3632      |
| INPP5D      | INPP5D (inositol polyphosphate-5-phosphatase D)                         | 3635      |
| INPP5E      | INPP5E (inositol polyphosphate-5-phosphatase E)                         | 56623     |
| INPP5J      | INPP5J (inositol polyphosphate-5-phosphatase J)                         | 27124     |
| INPP5K      | INPP5K (inositol polyphosphate-5-phosphatase K)                         | 51763     |
| INSIG1      | INSIG1 (insulin induced gene 1)                                         | 3638      |
| INSIG2      | INSIG2 (insulin induced gene 2)                                         | 51141     |
| INSLS       | INSLS (insulin-like 5)                                                  | 10022     |
| INSM1       | INSM1 (insulinoma-associated 1)                                         | 3642      |
| INSM2       | INSM2 (insulinoma-associated 2)                                         | 84684     |
| INSR        | INSR (insulin receptor)                                                 | 3643      |
| INTS12      | INTS12 (integrator complex subunit 12)                                  | 57117     |
| INTS2       | INTS2 (integrator complex subunit 2)                                    | 57508     |
| INTS3       | INTS3 (integrator complex subunit 3)                                    | 65123     |
| INTS4       | INTS4 (integrator complex subunit 4)                                    | 92105     |
| INTS6       | INTS6 (integrator complex subunit 6)                                    | 26512     |
| INTS7       | INTS7 (integrator complex subunit 7)                                    | 25896     |
| INTS8       | INTS8 (integrator complex subunit 8)                                    | 55656     |
| INTU        | INTU (inturned planar cell polarity protein)                            | 27152     |
| INVS        | INVS (inversin)                                                         | 27130     |
| IP6K1       | IP6K1 (inositol hexakisphosphate kinase 1)                              | 9807      |
| IP6K3       | IP6K3 (inositol hexakisphosphate kinase 3)                              | 117283    |
| IPCEF1      | IPCEF1 (interaction protein for cytohesin exchange factor 1)            | 26034     |
| IPMK        | IPMK (inositol polyphosphate multikinase)                               | 253430    |
| IPO11       | IPO11 (importin 11)                                                     | 51194     |
| IPO4        | IPO4 (importin 4)                                                       | 79711     |
| IPO5        | IPO5 (importin 5)                                                       | 3843      |
| IPO7        | IPO7 (importin 7)                                                       | 10527     |
| IPO8        | IPO8 (importin 8)                                                       | 10526     |
| IPO9        | IPO9 (importin 9)                                                       | 55705     |
| IPP         | IPP (intracisternal A particle-promoted polypeptide)                    | 3652      |
| IPPK        | IPPK (inositol 1,3,4,5,6-pentakisphosphate 2-kinase)                    | 64768     |
| IQCJ-SCHIP1 | IQCJ-SCHIP1 (IQCJ-SCHIP1 readthrough)                                   | 100505385 |
| IQCK        | IQCK (IQ motif containing K)                                            | 124152    |
| IQGAP1      | IQGAP1 (IQ motif containing GTPase activating protein 1)                | 8826      |
| IQGAP2      | IQGAP2 (IQ motif containing GTPase activating protein 2)                | 10788     |
| IQSEC1      | IQSEC1 (IQ motif and Sec7 domain 1)                                     | 9922      |
| IQSEC2      | IQSEC2 (IQ motif and Sec7 domain 2)                                     | 23096     |
| IRAK1       | IRAK1 (interleukin-1 receptor-associated kinase 1)                      | 3654      |
| IRAK1BP1    | IRAK1BP1 (interleukin-1 receptor-associated kinase 1 binding protein 1) | 134728    |

|                      |                                                                             |           |
|----------------------|-----------------------------------------------------------------------------|-----------|
| IRAK2                | IRAK2 (interleukin-1 receptor-associated kinase 2)                          | 3656      |
| IRAK3                | IRAK3 (interleukin-1 receptor-associated kinase 3)                          | 11213     |
| IREB2                | IREB2 (iron-responsive element binding protein 2)                           | 3658      |
| IRF1                 | IRF1 (interferon regulatory factor 1)                                       | 3659      |
| IRF2                 | IRF2 (interferon regulatory factor 2)                                       | 3660      |
| IRF2BP1              | IRF2BP1 (interferon regulatory factor 2 binding protein 1)                  | 26145     |
| IRF2BP2              | IRF2BP2 (interferon regulatory factor 2 binding protein 2)                  | 359948    |
| IRF2BPL              | IRF2BPL (interferon regulatory factor 2 binding protein-like)               | 64207     |
| IRF4                 | IRF4 (interferon regulatory factor 4)                                       | 3662      |
| IRF6                 | IRF6 (interferon regulatory factor 6)                                       | 3664      |
| IRF8                 | IRF8 (interferon regulatory factor 8)                                       | 3394      |
| IRF9                 | IRF9 (interferon regulatory factor 9)                                       | 10379     |
| IRGQ                 | IRGQ (immunity-related GTPase family, Q)                                    | 126298    |
| IRS1                 | IRS1 (insulin receptor substrate 1)                                         | 3667      |
| IRS2                 | IRS2 (insulin receptor substrate 2)                                         | 8660      |
| IRS4                 | IRS4 (insulin receptor substrate 4)                                         | 8471      |
| IRX2                 | IRX2 (Iroquois homeobox 2)                                                  | 153572    |
| IRX4                 | IRX4 (Iroquois homeobox 4)                                                  | 50805     |
| IRX5                 | IRX5 (Iroquois homeobox 5)                                                  | 10265     |
| IRX6                 | IRX6 (Iroquois homeobox 6)                                                  | 79190     |
| ISCA1                | ISCA1 (iron-sulfur cluster assembly 1)                                      | 81689     |
| ISCA2                | ISCA2 (iron-sulfur cluster assembly 2)                                      | 122961    |
| ISG20L2              | ISG20L2 (interferon stimulated exonuclease gene 20kDa)                      | 81875     |
| ISL1                 | ISL1 (ISL LIM homeobox 1)                                                   | 3670      |
| ISL2                 | ISL2 (ISL LIM homeobox 2)                                                   | 64843     |
| ISLR                 | ISLR (immunoglobulin superfamily containing leucine-rich repeats)           | 3671      |
| ISLR2                | ISLR2 (immunoglobulin superfamily containing leucine-rich repeats)          | 57611     |
| ISM1                 | ISM1 (isthmin 1, angiogenesis inhibitor)                                    | 140862    |
| ISM2                 | ISM2 (isthmin 2)                                                            | 145501    |
| ISOC1                | ISOC1 (isochorismatase domain containing 1)                                 | 51015     |
| ISPD                 | ISPD (isoprenoid synthase domain containing)                                | 729920    |
| IST1                 | IST1 (increased sodium tolerance 1 homolog (yeast))                         | 9798      |
| ISY1-RAB43           | ISY1-RAB43 (ISY1-RAB43 readthrough)                                         | 100534599 |
| ITCH                 | ITCH (Itchy E3 ubiquitin protein ligase)                                    | 83737     |
| ITFG1                | ITFG1 (integrin alpha FG-GAP repeat containing 1)                           | 81533     |
| ITFG3 (Mus musculus) | FAM234A (family with sequence similarity 234, member 3)                     | 83986     |
| ITGA1                | ITGA1 (integrin, alpha 1)                                                   | 3672      |
| ITGA10               | ITGA10 (integrin, alpha 10)                                                 | 8515      |
| ITGA11               | ITGA11 (integrin, alpha 11)                                                 | 22801     |
| ITGA2                | ITGA2 (integrin, alpha 2 (CD49B, alpha 2 subunit of VLA-4))                 | 3673      |
| ITGA3                | ITGA3 (integrin, alpha 3 (antigen CD49C, alpha 3 subunit of VLA-3))         | 3675      |
| ITGA4                | ITGA4 (integrin, alpha 4 (antigen CD49D, alpha 4 subunit of VLA-4))         | 3676      |
| ITGA5                | ITGA5 (integrin, alpha 5 (fibronectin receptor, alpha polypeptide))         | 3678      |
| ITGA6                | ITGA6 (integrin, alpha 6)                                                   | 3655      |
| ITGA7                | ITGA7 (integrin, alpha 7)                                                   | 3679      |
| ITGA8                | ITGA8 (integrin, alpha 8)                                                   | 8516      |
| ITGA9                | ITGA9 (integrin, alpha 9)                                                   | 3680      |
| ITGAE                | ITGAE (integrin, alpha E (antigen CD103, human mucosa 6))                   | 3682      |
| ITGAV                | ITGAV (integrin, alpha V)                                                   | 3685      |
| ITGB1                | ITGB1 (integrin, beta 1 (fibronectin receptor, beta polypeptide))           | 3688      |
| ITGB1BP1             | ITGB1BP1 (integrin beta 1 binding protein 1)                                | 9270      |
| ITGB3                | ITGB3 (integrin, beta 3 (platelet glycoprotein IIb, antigen CD61))          | 3690      |
| ITGB3BP              | ITGB3BP (integrin beta 3 binding protein (beta3-endoneurin))                | 23421     |
| ITGB4                | ITGB4 (integrin, beta 4)                                                    | 3691      |
| ITGB5                | ITGB5 (integrin, beta 5)                                                    | 3693      |
| ITGB6                | ITGB6 (integrin, beta 6)                                                    | 3694      |
| ITGB8                | ITGB8 (integrin, beta 8)                                                    | 3696      |
| ITGBL1               | ITGBL1 (integrin, beta-like 1 (with EGF-like repeat domain))                | 9358      |
| ITIH5                | ITIH5 (inter-alpha-trypsin inhibitor heavy chain family, member 5)          | 80760     |
| ITIH6                | ITIH6 (inter-alpha-trypsin inhibitor heavy chain family, member 6)          | 347365    |
| ITK                  | ITK (IL2-inducible T-cell kinase)                                           | 3702      |
| ITM2B                | ITM2B (integral membrane protein 2B)                                        | 9445      |
| ITM2C                | ITM2C (integral membrane protein 2C)                                        | 81618     |
| ITPA                 | ITPA (inosine triphosphatase (nucleoside triphosphate pyrophosphatase))     | 3704      |
| ITPK1                | ITPK1 (inositol-tetrakisphosphate 1-kinase)                                 | 3705      |
| ITPKA                | ITPKA (inositol-trisphosphate 3-kinase A)                                   | 3706      |
| ITPKB                | ITPKB (inositol-trisphosphate 3-kinase B)                                   | 3707      |
| ITPKC                | ITPKC (inositol-trisphosphate 3-kinase C)                                   | 80271     |
| ITPR1                | ITPR1 (inositol 1,4,5-trisphosphate receptor, type 1)                       | 3708      |
| ITPR2                | ITPR2 (inositol 1,4,5-trisphosphate receptor, type 2)                       | 3709      |
| ITPR3                | ITPR3 (inositol 1,4,5-trisphosphate receptor, type 3)                       | 3710      |
| ITPRIP               | ITPRIP (inositol 1,4,5-trisphosphate receptor interacting protein)          | 85450     |
| ITPRIPL1             | ITPRIPL1 (inositol 1,4,5-trisphosphate receptor interacting protein-like 1) | 150771    |
| ITPRIPL2             | ITPRIPL2 (inositol 1,4,5-trisphosphate receptor interacting protein-like 2) | 162073    |
| ITSN1                | ITSN1 (intersectin 1 (SH3 domain protein))                                  | 6453      |
| ITSN2                | ITSN2 (intersectin 2)                                                       | 50618     |
| IVD                  | IVD (isovaleryl-CoA dehydrogenase)                                          | 3712      |
| IVNS1ABP             | IVNS1ABP (influenza virus NS1A binding protein)                             | 10625     |
| JAG1                 | JAG1 (jagged 1)                                                             | 182       |
| JAG2                 | JAG2 (jagged 2)                                                             | 3714      |
| JAGN1                | JAGN1 (jagunal homolog 1)                                                   | 84522     |
| JAK1                 | JAK1 (Janus kinase 1)                                                       | 3716      |
| JAK2                 | JAK2 (Janus kinase 2)                                                       | 3717      |
| JAK3                 | JAK3 (Janus kinase 3)                                                       | 3718      |
| JAKMIP1              | JAKMIP1 (Janus kinase and microtubule interacting protein 1)                | 152789    |
| JAKMIP2              | JAKMIP2 (Janus kinase and microtubule interacting protein 2)                | 9832      |

|                       |                                                         |        |
|-----------------------|---------------------------------------------------------|--------|
| JAKMIP3               | JAKMIP3 (Janus kinase and microtubule interacting prot  | 282973 |
| JAM2                  | JAM2 (junctional adhesion molecule 2)                   | 58494  |
| JAM3                  | JAM3 (junctional adhesion molecule 3)                   | 83700  |
| JARID2                | JARID2 (jumoni), AT rich interactive domain 2)          | 3720   |
| JAZF1                 | JAZF1 (JAZF zinc finger 1)                              | 221895 |
| JDP2                  | JDP2 (Jun dimerization protein 2)                       | 122953 |
| JMJD1C                | JMJD1C (jumoni) domain containing 1C)                   | 221037 |
| JMJD7-PLA2G4B         | JMJD7-PLA2G4B (JMJD7-PLA2G4B readthrough)               | 8681   |
| JMJD8                 | JMJD8 (jumoni) domain containing 8)                     | 339123 |
| JMY                   | JMY (junction mediating and regulatory protein, p53 cof | 133746 |
| JOSD1                 | JOSD1 (Josephin domain containing 1)                    | 9929   |
| JPH1                  | JPH1 (junctophilin 1)                                   | 56704  |
| JPH2                  | JPH2 (junctophilin 2)                                   | 57158  |
| JPH3                  | JPH3 (junctophilin 3)                                   | 57338  |
| JPH4                  | JPH4 (junctophilin 4)                                   | 84502  |
| JRKL                  | JRKL (JRK-like)                                         | 8690   |
| JUN                   | JUN (jun proto-oncogene)                                | 3725   |
| JUNB                  | JUNB (jun B proto-oncogene)                             | 3726   |
| JUND                  | JUND (jun D proto-oncogene)                             | 3727   |
| KALRN                 | KALRN (kalrin, RhoGEF kinase)                           | 8997   |
| KANK1                 | KANK1 (KN motif and ankyrin repeat domains 1)           | 23189  |
| KANK2                 | KANK2 (KN motif and ankyrin repeat domains 2)           | 25959  |
| KANK4                 | KANK4 (KN motif and ankyrin repeat domains 4)           | 163782 |
| KANSL1                | KANSL1 (KAT8 regulatory NSL complex subunit 1)          | 284058 |
| KARS                  | KARS (lysyl-tRNA synthetase)                            | 3735   |
| KAT2A                 | KAT2A (K(lysine) acetyltransferase 2A)                  | 2648   |
| KAT2B                 | KAT2B (K(lysine) acetyltransferase 2B)                  | 8850   |
| KAT5                  | KAT5 (K(lysine) acetyltransferase 5)                    | 10524  |
| KAT6A                 | KAT6A (K(lysine) acetyltransferase 6A)                  | 7994   |
| KAT6B                 | KAT6B (K(lysine) acetyltransferase 6B)                  | 23522  |
| KAT7                  | KAT7 (K(lysine) acetyltransferase 7)                    | 11143  |
| KATNA1                | KATNA1 (katanin p60 (ATPase containing) subunit A 1)    | 11104  |
| KATNAL1               | KATNAL1 (katanin p60 subunit A-like 1)                  | 84056  |
| KATNAL2               | KATNAL2 (katanin p60 subunit A-like 2)                  | 83473  |
| KATNB1                | KATNB1 (katanin p80 (WD repeat containing) subunit B    | 10300  |
| KATNBL1               | KATNBL1 (katanin p80 subunit B-like 1)                  | 79768  |
| KAZALD1               | KAZALD1 (Kazal-type serine peptidase inhibitor domain   | 81621  |
| KAZN                  | KAZN (kazrin, periplakin interacting protein)           | 23254  |
| KBTBD11               | KBTBD11 (kelch repeat and BTB (POZ) domain containin    | 9920   |
| KBTBD12               | KBTBD12 (kelch repeat and BTB (POZ) domain containin    | 166348 |
| KBTBD13               | KBTBD13 (kelch repeat and BTB (POZ) domain containin    | 390594 |
| KBTBD2                | KBTBD2 (kelch repeat and BTB (POZ) domain containing    | 25948  |
| KBTBD4                | KBTBD4 (kelch repeat and BTB (POZ) domain containing    | 55709  |
| KBTBD6                | KBTBD6 (kelch repeat and BTB (POZ) domain containing    | 89890  |
| KBTBD7                | KBTBD7 (kelch repeat and BTB (POZ) domain containing    | 84078  |
| KBTBD8                | KBTBD8 (kelch repeat and BTB (POZ) domain containing    | 84541  |
| KCMF1                 | KCMF1 (potassium channel modulatory factor 1)           | 56888  |
| KCNA1                 | KCNA1 (potassium channel, voltage gated shaker relate   | 3736   |
| KCNA2                 | KCNA2 (potassium channel, voltage gated shaker relate   | 3737   |
| KCNA3                 | KCNA3 (potassium channel, voltage gated shaker relate   | 3738   |
| KCNA4                 | KCNA4 (potassium channel, voltage gated shaker relate   | 3739   |
| KCNA5                 | KCNA5 (potassium channel, voltage gated shaker relate   | 3741   |
| KCNA6                 | KCNA6 (potassium channel, voltage gated shaker relate   | 3742   |
| KCNA7                 | KCNA7 (potassium channel, voltage gated shaker relate   | 3743   |
| KCNAB1                | KCNAB1 (potassium channel, voltage gated subfamily A    | 7881   |
| KCNAB3                | KCNAB3 (potassium channel, voltage gated subfamily A    | 9196   |
| KCNB1                 | KCNB1 (potassium channel, voltage gated Shab related s  | 3745   |
| KCNB2                 | KCNB2 (potassium channel, voltage gated Shab related s  | 9312   |
| KCNC1                 | KCNC1 (potassium channel, voltage gated Shaw related    | 3746   |
| KCNC2                 | KCNC2 (potassium channel, voltage gated Shaw related    | 3747   |
| KCNC3                 | KCNC3 (potassium channel, voltage gated Shaw related    | 3748   |
| KCNC4                 | KCNC4 (potassium channel, voltage gated Shaw related    | 3749   |
| KCND1                 | KCND1 (potassium channel, voltage gated Shal related s  | 3750   |
| KCND2                 | KCND2 (potassium channel, voltage gated Shal related s  | 3751   |
| KCND3                 | KCND3 (potassium channel, voltage gated Shal related s  | 3752   |
| KCNE1                 | KCNE1 (potassium channel, voltage gated subfamily E re  | 3753   |
| KCNE1L (Mus musculus) | KCNE5 (potassium channel, voltage gated subfamily E re  | 23630  |
| KCNE3                 | KCNE3 (potassium channel, voltage gated subfamily E re  | 10008  |
| KCNE4                 | KCNE4 (potassium channel, voltage gated subfamily E re  | 23704  |
| KCNG3                 | KCNG3 (potassium channel, voltage gated modifier subf   | 170850 |
| KCNH1                 | KCNH1 (potassium channel, voltage gated eag related s   | 3756   |
| KCNH3                 | KCNH3 (potassium channel, voltage gated eag related s   | 23416  |
| KCNH4                 | KCNH4 (potassium channel, voltage gated eag related s   | 23415  |
| KCNH5                 | KCNH5 (potassium channel, voltage gated eag related s   | 27133  |
| KCNH6                 | KCNH6 (potassium channel, voltage gated eag related s   | 81033  |
| KCNH7                 | KCNH7 (potassium channel, voltage gated eag related s   | 90134  |
| KCNH8                 | KCNH8 (potassium channel, voltage gated eag related s   | 131096 |
| KCNIP1                | KCNIP1 (Kv channel interacting protein 1)               | 30820  |
| KCNIP2                | KCNIP2 (Kv channel interacting protein 2)               | 30819  |
| KCNIP3                | KCNIP3 (Kv channel interacting protein 3, calsenuilin)  | 30818  |
| KCNIP4                | KCNIP4 (Kv channel interacting protein 4)               | 80333  |
| KCNJ1                 | KCNJ1 (potassium channel, inwardly rectifying subfamily | 3758   |
| KCNJ10                | KCNJ10 (potassium channel, inwardly rectifying subfami  | 3766   |
| KCNJ11                | KCNJ11 (potassium channel, inwardly rectifying subfami  | 3767   |
| KCNJ12                | KCNJ12 (potassium channel, inwardly rectifying subfami  | 3768   |
| KCNJ13                | KCNJ13 (potassium channel, inwardly rectifying subfami  | 3769   |

|           |                                                       |        |
|-----------|-------------------------------------------------------|--------|
| KCNJ14    | KCNJ14 (potassium channel, inwardly rectifying subfam | 3770   |
| KCNJ15    | KCNJ15 (potassium channel, inwardly rectifying subfam | 3772   |
| KCNJ2     | KCNJ2 (potassium channel, inwardly rectifying subfam) | 3759   |
| KCNJ3     | KCNJ3 (potassium channel, inwardly rectifying subfam) | 3760   |
| KCNJ5     | KCNJ5 (potassium channel, inwardly rectifying subfam) | 3762   |
| KCNJ6     | KCNJ6 (potassium channel, inwardly rectifying subfam) | 3763   |
| KCNJ8     | KCNJ8 (potassium channel, inwardly rectifying subfam) | 3764   |
| KCNJ9     | KCNJ9 (potassium channel, inwardly rectifying subfam) | 3765   |
| KCNK1     | KCNK1 (potassium channel, two pore domain subfamily   | 3775   |
| KCNK10    | KCNK10 (potassium channel, two pore domain subfam     | 54207  |
| KCNK12    | KCNK12 (potassium channel, two pore domain subfam)    | 56660  |
| KCNK13    | KCNK13 (potassium channel, two pore domain subfam)    | 56659  |
| KCNK15    | KCNK15 (potassium channel, two pore domain subfam)    | 60598  |
| KCNK17    | KCNK17 (potassium channel, two pore domain subfam)    | 89822  |
| KCNK2     | KCNK2 (potassium channel, two pore domain subfamily   | 3776   |
| KCNK3     | KCNK3 (potassium channel, two pore domain subfamily   | 3777   |
| KCNK5     | KCNK5 (potassium channel, two pore domain subfamily   | 86545  |
| KCNK6     | KCNK6 (potassium channel, two pore domain subfamily   | 9424   |
| KCNK7     | KCNK7 (potassium channel, two pore domain subfamily   | 10089  |
| KCNK9     | KCNK9 (potassium channel, two pore domain subfamily   | 51305  |
| KCNMB2    | KCNMB2 (potassium channel subfamily M regulatory be   | 10242  |
| KCNMB3    | KCNMB3 (potassium channel subfamily M regulatory be   | 27094  |
| KCNMB4    | KCNMB4 (potassium channel subfamily M regulatory be   | 27345  |
| KCNN2     | KCNN2 (potassium channel, calcium activated intermedi | 3781   |
| KCNN3     | KCNN3 (potassium channel, calcium activated intermedi | 3782   |
| KCNN4     | KCNN4 (potassium channel, calcium activated intermedi | 3783   |
| KCNQ3     | KCNQ3 (potassium channel, voltage gated KQT-like subf | 3786   |
| KCNQ4     | KCNQ4 (potassium channel, voltage gated KQT-like subf | 9132   |
| KCNQ5     | KCNQ5 (potassium channel, voltage gated KQT-like subf | 56479  |
| KCNRG     | KCNRG (potassium channel regulator)                   | 283518 |
| KCNS1     | KCNS1 (potassium voltage-gated channel, modifier subf | 3787   |
| KCNS2     | KCNS2 (potassium voltage-gated channel, modifier subf | 3788   |
| KCNS3     | KCNS3 (potassium voltage-gated channel, modifier subf | 3790   |
| KCNV1     | KCNV1 (potassium channel, voltage gated modifier subf | 27012  |
| KCTD1     | KCTD1 (potassium channel tetramerization domain cont  | 284252 |
| KCTD10    | KCTD10 (potassium channel tetramerization domain cor  | 83892  |
| KCTD12    | KCTD12 (potassium channel tetramerization domain cor  | 115207 |
| KCTD13    | KCTD13 (potassium channel tetramerization domain cor  | 253980 |
| KCTD15    | KCTD15 (potassium channel tetramerization domain cor  | 79047  |
| KCTD16    | KCTD16 (potassium channel tetramerization domain cor  | 57528  |
| KCTD17    | KCTD17 (potassium channel tetramerization domain cor  | 79734  |
| KCTD2     | KCTD2 (potassium channel tetramerization domain cont  | 23510  |
| KCTD20    | KCTD20 (potassium channel tetramerization domain cor  | 222658 |
| KCTD21    | KCTD21 (potassium channel tetramerization domain cor  | 283219 |
| KCTD3     | KCTD3 (potassium channel tetramerization domain cont  | 51133  |
| KCTD4     | KCTD4 (potassium channel tetramerization domain cont  | 386618 |
| KCTD5     | KCTD5 (potassium channel tetramerization domain cont  | 54442  |
| KCTD6     | KCTD6 (potassium channel tetramerization domain cont  | 200845 |
| KCTD7     | KCTD7 (potassium channel tetramerization domain cont  | 154881 |
| KCTD8     | KCTD8 (potassium channel tetramerization domain cont  | 386617 |
| KCTD9     | KCTD9 (potassium channel tetramerization domain cont  | 54793  |
| KDEL2     | KDEL2 (KDEL (Lys-Asp-Glu-Leu) containing 2)           | 143888 |
| KDEL1     | KDEL1 (KDEL (Lys-Asp-Glu-Leu) endoplasmic reticulum   | 10945  |
| KDEL2     | KDEL2 (KDEL (Lys-Asp-Glu-Leu) endoplasmic reticulum   | 11014  |
| KDEL3     | KDEL3 (KDEL (Lys-Asp-Glu-Leu) endoplasmic reticulum   | 11015  |
| KDM1A     | KDM1A (lysine (K)-specific demethylase 1A)            | 23028  |
| KDM1B     | KDM1B (lysine (K)-specific demethylase 1B)            | 221656 |
| KDM2A     | KDM2A (lysine (K)-specific demethylase 2A)            | 22992  |
| KDM2B     | KDM2B (lysine (K)-specific demethylase 2B)            | 84678  |
| KDM3A     | KDM3A (lysine (K)-specific demethylase 3A)            | 55818  |
| KDM3B     | KDM3B (lysine (K)-specific demethylase 3B)            | 51780  |
| KDM4A     | KDM4A (lysine (K)-specific demethylase 4A)            | 9682   |
| KDM4B     | KDM4B (lysine (K)-specific demethylase 4B)            | 23030  |
| KDM5A     | KDM5A (lysine (K)-specific demethylase 5A)            | 5927   |
| KDM5B     | KDM5B (lysine (K)-specific demethylase 5B)            | 10765  |
| KDM5C     | KDM5C (lysine (K)-specific demethylase 5C)            | 8242   |
| KDM6A     | KDM6A (lysine (K)-specific demethylase 6A)            | 7403   |
| KDM6B     | KDM6B (lysine (K)-specific demethylase 6B)            | 23135  |
| KDR       | KDR (kinase insert domain receptor)                   | 3791   |
| KDSR      | KDSR (3-ketodihydroshingosine reductase)              | 2531   |
| KEAP1     | KEAP1 (kelch-like ECH-associated protein 1)           | 9817   |
| KHDRBS1   | KHDRBS1 (KH domain containing, RNA binding, signal tr | 10657  |
| KHDRBS2   | KHDRBS2 (KH domain containing, RNA binding, signal tr | 202559 |
| KHDRBS3   | KHDRBS3 (KH domain containing, RNA binding, signal tr | 10656  |
| KHNYN     | KHNYN (KH and NYN domain containing)                  | 23351  |
| KHSRP     | KHSRP (KH-type splicing regulatory protein)           | 8570   |
| KIAA0020  | KIAA0020 (KIAA0020)                                   | 9933   |
| KIAA0040  | KIAA0040 (KIAA0040)                                   | 9674   |
| KIAA0087  | KIAA0087 (KIAA0087)                                   | 9808   |
| KIAA0100  | KIAA0100 (KIAA0100)                                   | 9703   |
| KIAA0101  | KIAA0101 (KIAA0101)                                   | 9768   |
| KIAA0141  | KIAA0141 (KIAA0141)                                   | 9812   |
| KIAA0195  | KIAA0195 (KIAA0195)                                   | 9772   |
| KIAA0226  | KIAA0226 (KIAA0226)                                   | 9711   |
| KIAA0226L | KIAA0226L (KIAA0226-like)                             | 80183  |
| KIAA0232  | KIAA0232 (KIAA0232)                                   | 9778   |

|           |                                                          |        |
|-----------|----------------------------------------------------------|--------|
| KIAA0319L | KIAA0319L (KIAA0319-like)                                | 79932  |
| KIAA0355  | KIAA0355 (KIAA0355)                                      | 9710   |
| KIAA0368  | KIAA0368 (KIAA0368)                                      | 23392  |
| KIAA0391  | KIAA0391 (KIAA0391)                                      | 9692   |
| KIAA0408  | KIAA0408 (KIAA0408)                                      | 9729   |
| KIAA0430  | KIAA0430 (KIAA0430)                                      | 9665   |
| KIAA0513  | KIAA0513 (KIAA0513)                                      | 9764   |
| KIAA0556  | KIAA0556 (KIAA0556)                                      | 23247  |
| KIAA0586  | KIAA0586 (KIAA0586)                                      | 9786   |
| KIAA0753  | KIAA0753 (KIAA0753)                                      | 9851   |
| KIAA0754  | KIAA0754 (KIAA0754)                                      | 643314 |
| KIAA0895  | KIAA0895 (KIAA0895)                                      | 23366  |
| KIAA0895L | KIAA0895L (KIAA0895-like)                                | 653319 |
| KIAA0922  | KIAA0922 (KIAA0922)                                      | 23240  |
| KIAA0930  | KIAA0930 (KIAA0930)                                      | 23313  |
| KIAA1024  | KIAA1024 (KIAA1024)                                      | 23251  |
| KIAA1033  | KIAA1033 (KIAA1033)                                      | 23325  |
| KIAA1109  | KIAA1109 (KIAA1109)                                      | 84162  |
| KIAA1147  | KIAA1147 (KIAA1147)                                      | 57189  |
| KIAA1161  | KIAA1161 (KIAA1161)                                      | 57462  |
| KIAA1210  | KIAA1210 (KIAA1210)                                      | 57481  |
| KIAA1211  | KIAA1211 (KIAA1211)                                      | 57482  |
| KIAA1211L | KIAA1211L (KIAA1211-like)                                | 343990 |
| KIAA1217  | KIAA1217 (KIAA1217)                                      | 56243  |
| KIAA1324  | KIAA1324 (KIAA1324)                                      | 57535  |
| KIAA1324L | KIAA1324L (KIAA1324-like)                                | 222223 |
| KIAA1328  | KIAA1328 (KIAA1328)                                      | 57536  |
| KIAA1429  | KIAA1429 (KIAA1429)                                      | 25962  |
| KIAA1456  | KIAA1456 (KIAA1456)                                      | 57604  |
| KIAA1462  | KIAA1462 (KIAA1462)                                      | 57608  |
| KIAA1468  | KIAA1468 (KIAA1468)                                      | 57614  |
| KIAA1522  | KIAA1522 (KIAA1522)                                      | 57648  |
| KIAA1549  | KIAA1549 (KIAA1549)                                      | 57670  |
| KIAA1549L | KIAA1549L (KIAA1549-like)                                | 25758  |
| KIAA1551  | KIAA1551 (KIAA1551)                                      | 55196  |
| KIAA1586  | KIAA1586 (KIAA1586)                                      | 57691  |
| KIAA1614  | KIAA1614 (KIAA1614)                                      | 57710  |
| KIAA1644  | KIAA1644 (KIAA1644)                                      | 85352  |
| KIAA1671  | KIAA1671 (KIAA1671)                                      | 85379  |
| KIAA1755  | KIAA1755 (KIAA1755)                                      | 85449  |
| KIAA1841  | KIAA1841 (KIAA1841)                                      | 84542  |
| KIAA1919  | KIAA1919 (KIAA1919)                                      | 91749  |
| KIAA1958  | KIAA1958 (KIAA1958)                                      | 158405 |
| KIAA2013  | KIAA2013 (KIAA2013)                                      | 90231  |
| KIAA2018  | KIAA2018 (KIAA2018)                                      | 205717 |
| KIAA2022  | KIAA2022 (KIAA2022)                                      | 340533 |
| KIAA2026  | KIAA2026 (KIAA2026)                                      | 158358 |
| KIF11     | KIF11 (kinesin family member 11)                         | 3832   |
| KIF13A    | KIF13A (kinesin family member 13A)                       | 63971  |
| KIF13B    | KIF13B (kinesin family member 13B)                       | 23303  |
| KIF14     | KIF14 (kinesin family member 14)                         | 9928   |
| KIF16B    | KIF16B (kinesin family member 16B)                       | 55614  |
| KIF17     | KIF17 (kinesin family member 17)                         | 57576  |
| KIF18B    | KIF18B (kinesin family member 18B)                       | 146909 |
| KIF19     | KIF19 (kinesin family member 19)                         | 124602 |
| KIF1B     | KIF1B (kinesin family member 1B)                         | 23095  |
| KIF1C     | KIF1C (kinesin family member 1C)                         | 10749  |
| KIF20A    | KIF20A (kinesin family member 20A)                       | 10112  |
| KIF21A    | KIF21A (kinesin family member 21A)                       | 55605  |
| KIF21B    | KIF21B (kinesin family member 21B)                       | 23046  |
| KIF23     | KIF23 (kinesin family member 23)                         | 9493   |
| KIF24     | KIF24 (kinesin family member 24)                         | 347240 |
| KIF26A    | KIF26A (kinesin family member 26A)                       | 26153  |
| KIF26B    | KIF26B (kinesin family member 26B)                       | 55083  |
| KIF2A     | KIF2A (kinesin heavy chain member 2A)                    | 3796   |
| KIF3A     | KIF3A (kinesin family member 3A)                         | 11127  |
| KIF3B     | KIF3B (kinesin family member 3B)                         | 9371   |
| KIF3C     | KIF3C (kinesin family member 3C)                         | 3797   |
| KIF5A     | KIF5A (kinesin family member 5A)                         | 3798   |
| KIF5B     | KIF5B (kinesin family member 5B)                         | 3799   |
| KIF5C     | KIF5C (kinesin family member 5C)                         | 3800   |
| KIF6      | KIF6 (kinesin family member 6)                           | 221458 |
| KIFAP3    | KIFAP3 (kinesin-associated protein 3)                    | 22920  |
| KIN       | KIN (Kin17 DNA and RNA binding protein)                  | 22944  |
| KIR2DL4   | KIR2DL4 (killer cell immunoglobulin-like receptor, two d | 3805   |
| KIRREL    | KIRREL (kin of IRRE like (Drosophila))                   | 55243  |
| KISS1     | KISS1 (KISS-1 metastasis-suppressor)                     | 3814   |
| KIT       | KIT (v-kit Hardy-Zuckerman 4 feline sarcoma viral oncog  | 3815   |
| KITLG     | KITLG (KIT ligand)                                       | 4254   |
| KL        | KL (klotho)                                              | 9365   |
| KLB       | KLB (klotho beta)                                        | 152831 |
| KLC1      | KLC1 (kinesin light chain 1)                             | 3831   |
| KLC2      | KLC2 (kinesin light chain 2)                             | 64837  |
| KLF10     | KLF10 (Kruppel-like factor 10)                           | 7071   |
| KLF11     | KLF11 (Kruppel-like factor 11)                           | 8462   |
| KLF12     | KLF12 (Kruppel-like factor 12)                           | 11278  |

|           |                                                        |           |
|-----------|--------------------------------------------------------|-----------|
| KLF13     | KLF13 (Kruppel-like factor 13)                         | 51621     |
| KLF14     | KLF14 (Kruppel-like factor 14)                         | 136259    |
| KLF15     | KLF15 (Kruppel-like factor 15)                         | 28999     |
| KLF16     | KLF16 (Kruppel-like factor 16)                         | 83855     |
| KLF2      | KLF2 (Kruppel-like factor 2)                           | 10365     |
| KLF3      | KLF3 (Kruppel-like factor 3 (basic))                   | 51274     |
| KLF4      | KLF4 (Kruppel-like factor 4 (gut))                     | 9314      |
| KLF5      | KLF5 (Kruppel-like factor 5 (intestinal))              | 688       |
| KLF6      | KLF6 (Kruppel-like factor 6)                           | 1316      |
| KLF7      | KLF7 (Kruppel-like factor 7 (ubiquitous))              | 8609      |
| KLF8      | KLF8 (Kruppel-like factor 8)                           | 11279     |
| KLF9      | KLF9 (Kruppel-like factor 9)                           | 687       |
| KLHDC10   | KLHDC10 (kelch domain containing 10)                   | 23008     |
| KLHDC7A   | KLHDC7A (kelch domain containing 7A)                   | 127707    |
| KLHDC8A   | KLHDC8A (kelch domain containing 8A)                   | 55220     |
| KLHDC8B   | KLHDC8B (kelch domain containing 8B)                   | 200942    |
| KLHDC9    | KLHDC9 (kelch domain containing 9)                     | 126823    |
| KLHL10    | KLHL10 (kelch-like family member 10)                   | 317719    |
| KLHL11    | KLHL11 (kelch-like family member 11)                   | 55175     |
| KLHL12    | KLHL12 (kelch-like family member 12)                   | 59349     |
| KLHL13    | KLHL13 (kelch-like family member 13)                   | 90293     |
| KLHL14    | KLHL14 (kelch-like family member 14)                   | 57565     |
| KLHL15    | KLHL15 (kelch-like family member 15)                   | 80311     |
| KLHL17    | KLHL17 (kelch-like family member 17)                   | 339451    |
| KLHL18    | KLHL18 (kelch-like family member 18)                   | 23276     |
| KLHL2     | KLHL2 (kelch-like family member 2)                     | 11275     |
| KLHL20    | KLHL20 (kelch-like family member 20)                   | 27252     |
| KLHL21    | KLHL21 (kelch-like family member 21)                   | 9903      |
| KLHL23    | KLHL23 (kelch-like family member 23)                   | 151230    |
| KLHL24    | KLHL24 (kelch-like family member 24)                   | 54800     |
| KLHL26    | KLHL26 (kelch-like family member 26)                   | 55295     |
| KLHL28    | KLHL28 (kelch-like family member 28)                   | 54813     |
| KLHL29    | KLHL29 (kelch-like family member 29)                   | 114818    |
| KLHL3     | KLHL3 (kelch-like family member 3)                     | 26249     |
| KLHL31    | KLHL31 (kelch-like family member 31)                   | 401265    |
| KLHL32    | KLHL32 (kelch-like family member 32)                   | 114792    |
| KLHL33    | KLHL33 (kelch-like family member 33)                   | 123103    |
| KLHL36    | KLHL36 (kelch-like family member 36)                   | 79786     |
| KLHL38    | KLHL38 (kelch-like family member 38)                   | 340359    |
| KLHL42    | KLHL42 (kelch-like family member 42)                   | 57542     |
| KLHL5     | KLHL5 (kelch-like family member 5)                     | 51088     |
| KLHL6     | KLHL6 (kelch-like family member 6)                     | 89857     |
| KLHL7     | KLHL7 (kelch-like family member 7)                     | 55975     |
| KLHL8     | KLHL8 (kelch-like family member 8)                     | 57563     |
| KLHL9     | KLHL9 (kelch-like family member 9)                     | 55958     |
| KLK10     | KLK10 (kallikrein-related peptidase 10)                | 5655      |
| KLK12     | KLK12 (kallikrein-related peptidase 12)                | 43849     |
| KLK15     | KLK15 (kallikrein-related peptidase 15)                | 55554     |
| KLK5      | KLK5 (kallikrein-related peptidase 5)                  | 25818     |
| KLNL      | KLNL (kallikrein-related peptidase 5)                  | 100144748 |
| KMT2A     | KMT2A (lysine (K)-specific methyltransferase 2A)       | 4297      |
| KMT2B     | KMT2B (lysine (K)-specific methyltransferase 2B)       | 9757      |
| KMT2C     | KMT2C (lysine (K)-specific methyltransferase 2C)       | 58508     |
| KMT2D     | KMT2D (lysine (K)-specific methyltransferase 2D)       | 8085      |
| KMT2E     | KMT2E (lysine (K)-specific methyltransferase 2E)       | 55904     |
| KNCN      | KNCN (kinocilin)                                       | 148930    |
| KNDC1     | KNDC1 (kinase non-catalytic C-lobe domain (KIND) contz | 85442     |
| KNOP1     | KNOP1 (lysine-rich nucleolar protein 1)                | 400506    |
| KNSTRN    | KNSTRN (kinetochore-localized astrin/SPAG5 binding pr  | 90417     |
| KNTC1     | KNTC1 (kinetochore associated 1)                       | 9735      |
| KPNA1     | KPNA1 (karyopherin alpha 1 (importin alpha 5))         | 3836      |
| KPNA2     | KPNA2 (karyopherin alpha 2 (RAG cohort 1, importin alp | 3838      |
| KPNA3     | KPNA3 (karyopherin alpha 3 (importin alpha 4))         | 3839      |
| KPNA4     | KPNA4 (karyopherin alpha 4 (importin alpha 3))         | 3840      |
| KPNA5     | KPNA5 (karyopherin alpha 5 (importin alpha 6))         | 3841      |
| KPNA6     | KPNA6 (karyopherin alpha 6 (importin alpha 7))         | 23633     |
| KPNB1     | KPNB1 (karyopherin (importin) beta 1)                  | 3837      |
| KRAS      | KRAS (Kirsten rat sarcoma viral oncogene homolog)      | 3845      |
| KRBA1     | KRBA1 (KRAB-A domain containing 1)                     | 84626     |
| KRBA2     | KRBA2 (KRAB-A domain containing 2)                     | 124751    |
| KRBOX4    | KRBOX4 (KRAB box domain containing 4)                  | 55634     |
| KREMEN1   | KREMEN1 (kringle containing transmembrane protein 1)   | 83999     |
| KREMEN2   | KREMEN2 (kringle containing transmembrane protein 2)   | 79412     |
| KRIT1     | KRIT1 (KRIT1, ankyrin repeat containing)               | 889       |
| KRR1      | KRR1 (KRR1, small subunit (SSU) processome componen    | 11103     |
| KRT1      | KRT1 (keratin 1, type II)                              | 3848      |
| KRT2      | KRT2 (keratin 2, type II)                              | 3849      |
| KRT222    | KRT222 (keratin 222, type II)                          | 125113    |
| KRT34     | KRT34 (keratin 34, type I)                             | 3885      |
| KRT77     | KRT77 (keratin 77, type II)                            | 374454    |
| KRT78     | KRT78 (keratin 78, type II)                            | 196374    |
| KRT80     | KRT80 (keratin 80, type II)                            | 144501    |
| KRT81     | KRT81 (keratin 81, type II)                            | 3887      |
| KRT85     | KRT85 (keratin 85, type II)                            | 3891      |
| KRTAP10-4 | KRTAP10-4 (keratin associated protein 10-4)            | 386672    |
| KRTAP10-5 | KRTAP10-5 (keratin associated protein 10-5)            | 386680    |

|           |                                                          |           |
|-----------|----------------------------------------------------------|-----------|
| KRTAP10-8 | KRTAP10-8 (keratin associated protein 10-8)              | 386681    |
| KRTAP17-1 | KRTAP17-1 (keratin associated protein 17-1)              | 83902     |
| KRTAP4-4  | KRTAP4-4 (keratin associated protein 4-4)                | 84616     |
| KRTAP4-9  | KRTAP4-9 (keratin associated protein 4-9)                | 100132386 |
| KSR1      | KSR1 (kinase suppressor of ras 1)                        | 8844      |
| KT112     | KT112 (KT112 chromatin associated homolog)               | 112970    |
| KTN1      | KTN1 (kinectin 1 (kinesin receptor))                     | 3895      |
| KXD1      | KXD1 (KxDL motif containing 1)                           | 79036     |
| L1CAM     | L1CAM (L1 cell adhesion molecule)                        | 3897      |
| L2HGDH    | L2HGDH (L-2-hydroxyglutarate dehydrogenase)              | 79944     |
| L3MBTL1   | L3MBTL1 ((l3)mbt-like 1 (Drosophila))                    | 26013     |
| L3MBTL3   | L3MBTL3 ((l3)mbt-like 3 (Drosophila))                    | 84456     |
| L3MBTL4   | L3MBTL4 ((l3)mbt-like 4 (Drosophila))                    | 91133     |
| LACE1     | LACE1 (lactation elevated 1)                             | 246269    |
| LAD1      | LAD1 (ladinin 1)                                         | 3898      |
| LAMA3     | LAMA3 (laminin, alpha 3)                                 | 3909      |
| LAMA4     | LAMA4 (laminin, alpha 4)                                 | 3910      |
| LAMB3     | LAMB3 (laminin, beta 3)                                  | 3914      |
| LAMC1     | LAMC1 (laminin, gamma 1 (formerly LAMB2))                | 3915      |
| LAMC2     | LAMC2 (laminin, gamma 2)                                 | 3918      |
| LAMC3     | LAMC3 (laminin, gamma 3)                                 | 10319     |
| LAMP1     | LAMP1 (lysosomal-associated membrane protein 1)          | 3916      |
| LAMP2     | LAMP2 (lysosomal-associated membrane protein 2)          | 3920      |
| LAMP3     | LAMP3 (lysosomal-associated membrane protein 3)          | 27074     |
| LAMP5     | LAMP5 (lysosomal-associated membrane protein family)     | 24141     |
| LAMTOR1   | LAMTOR1 (late endosomal/lysosomal adaptor, MAPK ar       | 55004     |
| LAMTOR3   | LAMTOR3 (late endosomal/lysosomal adaptor, MAPK ar       | 8649      |
| LAMTOR5   | LAMTOR5 (late endosomal/lysosomal adaptor, MAPK ar       | 10542     |
| LANCL1    | LANCL1 (LanC lantibiotic synthetase component C-like 1   | 10314     |
| LANCL2    | LANCL2 (LanC lantibiotic synthetase component C-like 2   | 55915     |
| LANCL3    | LANCL3 (LanC lantibiotic synthetase component C-like 3   | 347404    |
| LAPTM4A   | LAPTM4A (lysosomal protein transmembrane 4 alpha)        | 9741      |
| LAPTM4B   | LAPTM4B (lysosomal protein transmembrane 4 beta)         | 55353     |
| LARGE     | LARGE (like-glycosyltransferase)                         | 9215      |
| LARP1     | LARP1 (La ribonucleoprotein domain family, member 1)     | 23367     |
| LARP4B    | LARP4B (La ribonucleoprotein domain family, member 4     | 23185     |
| LARS      | LARS (leucyl-tRNA synthetase)                            | 51520     |
| LAS1L     | LAS1L (LAS1-like, ribosome biogenesis factor)            | 81887     |
| LASP1     | LASP1 (LIM and SH3 protein 1)                            | 3927      |
| LAT       | LAT (linker for activation of T cells)                   | 27040     |
| LATS2     | LATS2 (large tumor suppressor kinase 2)                  | 26524     |
| LAYN      | LAYN (layilin)                                           | 143903    |
| LBH       | LBH (limb bud and heart development)                     | 81606     |
| LBP       | LBP (lipopolysaccharide binding protein)                 | 3929      |
| LBR       | LBR (lamin B receptor)                                   | 3930      |
| LBX1      | LBX1 (ladybird homeobox 1)                               | 10660     |
| LCAS      | LCAS (Leber congenital amaurosis 5)                      | 167691    |
| LCLAT1    | LCLAT1 (lysocardiolipin acyltransferase 1)               | 253558    |
| LCMT1     | LCMT1 (leucine carboxyl methyltransferase 1)             | 51451     |
| LCMT2     | LCMT2 (leucine carboxyl methyltransferase 2)             | 9836      |
| LCNL1     | LCNL1 (lipocalin-like 1)                                 | 401562    |
| LCOR      | LCOR (ligand dependent nuclear receptor corepressor)     | 84458     |
| LCORL     | LCORL (ligand dependent nuclear receptor corepressor-l   | 254251    |
| LCP1      | LCP1 (lymphocyte cytosolic protein 1 (L-plastin))        | 3936      |
| LCP2      | LCP2 (lymphocyte cytosolic protein 2 (SH2 domain cont    | 3937      |
| LDB1      | LDB1 (LIM domain binding 1)                              | 8861      |
| LDB2      | LDB2 (LIM domain binding 2)                              | 9079      |
| LDHA      | LDHA (lactate dehydrogenase A)                           | 3939      |
| LDHAL6A   | LDHAL6A (lactate dehydrogenase A-like 6A)                | 160287    |
| LDHD      | LDHD (lactate dehydrogenase D)                           | 197257    |
| LDLR      | LDLR (low density lipoprotein receptor)                  | 3949      |
| LDLRAD2   | LDLRAD2 (low density lipoprotein receptor class A doma   | 401944    |
| LDLRAD3   | LDLRAD3 (low density lipoprotein receptor class A doma   | 143458    |
| LDLRAD4   | LDLRAD4 (low density lipoprotein receptor class A doma   | 753       |
| LDLRAP1   | LDLRAP1 (low density lipoprotein receptor adaptor prot   | 26119     |
| LDOC1     | LDOC1 (leucine zipper, down-regulated in cancer 1)       | 23641     |
| LDOC1L    | LDOC1L (leucine zipper, down-regulated in cancer 1-like  | 84247     |
| LEF1      | LEF1 (lymphoid enhancer-binding factor 1)                | 51176     |
| LEFTY1    | LEFTY1 (left-right determination factor 1)               | 10637     |
| LEFTY2    | LEFTY2 (left-right determination factor 2)               | 7044      |
| LEMD2     | LEMD2 (LEM domain containing 2)                          | 221496    |
| LEMD3     | LEMD3 (LEM domain containing 3)                          | 23592     |
| LENG1     | LENG1 (leukocyte receptor cluster (LRC) member 1)        | 79165     |
| LENG8     | LENG8 (leukocyte receptor cluster (LRC) member 8)        | 114823    |
| LEP       | LEP (leptin)                                             | 3952      |
| LEPROT    | LEPROT (leptin receptor overlapping transcript)          | 54741     |
| LEPROTL1  | LEPROTL1 (leptin receptor overlapping transcript-like 1) | 23484     |
| LETM1     | LETM1 (leucine zipper-EF-hand containing transmembra     | 3954      |
| LETM2     | LETM2 (leucine zipper-EF-hand containing transmembra     | 137994    |
| LETMD1    | LETMD1 (LETM1 domain containing 1)                       | 25875     |
| LFNG      | LFNG (LFNG O-fucosylpeptide 3-beta-N-acetylglucosam      | 3955      |
| LGALS8    | LGALS8 (lectin, galactoside-binding, soluble, 8)         | 3964      |
| LGALS1    | LGALS1 (lectin, galactoside-binding-like)                | 29094     |
| LGI1      | LGI1 (leucine-rich, glioma inactivated 1)                | 9211      |
| LGI2      | LGI2 (leucine-rich repeat LGI family, member 2)          | 55203     |
| LGI3      | LGI3 (leucine-rich repeat LGI family, member 3)          | 203190    |

|        |                                                         |        |  |  |  |  |
|--------|---------------------------------------------------------|--------|--|--|--|--|
| LGI4   | LGI4 (leucine-rich repeat LGI family, member 4)         | 163175 |  |  |  |  |
| LGR4   | LGR4 (leucine-rich repeat containing G protein-coupled  | 55366  |  |  |  |  |
| LGSN   | LGSN (lengsin, lens protein with glutamine synthetase d | 51557  |  |  |  |  |
| LHFP   | LHFP (lipoma HMGIC fusion partner)                      | 10186  |  |  |  |  |
| LHFPL2 | LHFPL2 (lipoma HMGIC fusion partner-like 2)             | 10184  |  |  |  |  |
| LHFPL3 | LHFPL3 (lipoma HMGIC fusion partner-like 3)             | 375612 |  |  |  |  |
| LHFPL4 | LHFPL4 (lipoma HMGIC fusion partner-like 4)             | 375323 |  |  |  |  |
| LHPP   | LHPP (phospholysine phosphohistidine inorganic pyroph   | 64077  |  |  |  |  |
| LHX1   | LHX1 (LIM homeobox 1)                                   | 3975   |  |  |  |  |
| LHX2   | LHX2 (LIM homeobox 2)                                   | 9355   |  |  |  |  |
| LHX3   | LHX3 (LIM homeobox 3)                                   | 8022   |  |  |  |  |
| LHX4   | LHX4 (LIM homeobox 4)                                   | 89884  |  |  |  |  |
| LHX5   | LHX5 (LIM homeobox 5)                                   | 64211  |  |  |  |  |
| LHX6   | LHX6 (LIM homeobox 6)                                   | 26468  |  |  |  |  |
