# Supplementary material
Source: PubMed Central journal article supplement (PMC5328859)
Supplement: NIHMS842380-supplement-Supp_TableS5.pdf [file NIHMS842380-supplement-Supp_TableS5.pdf]

## SUPPLEMENTAL TABLE S5

BMI GWAS genes in clusters

| Temporal mRNA Expression Cluster from Fig.6 | # of GTEx genes in cluster | GTEx genes in cluster                             | # of BMI GWAS SNP closest genes in cluster | Gene symbol - SNP closest gene                            | enrichment p-value |       |
|---------------------------------------------|----------------------------|---------------------------------------------------|--------------------------------------------|-----------------------------------------------------------|--------------------|-------|
| cluster1                                    | 192                        | ABCA1,ASIC1,ASIC4,AFF2,ALCAM,ALDH3B1,ALK,ALPP,ANK | 14                                         | ALCAM,ALK,BCL2,CADM2,CSMD3,EPB41L4B,FOXP2,LINGO2,PDZRN4,R | 3.34E-07           | +515% |
| cluster2                                    | 230                        | AADAT,ACACB,ACTB,ADAM23,AGBL5,AGPAT4,AIF1L,AK2,/  | 6                                          | ALYL,SEMA6C,VWC2,WNK1,YWHAZ                               | 0.04922            |       |
| cluster3                                    | 208                        | ANKRD6,C1QL4,LAMP5,NDNF,CNTN2,CXXC4,EBF1,EBF3,FC  | 4                                          | ADAM23,BACE2,CCNE1,CPNE8,CPS1,RCAN2                       | 0.21558            |       |
| cluster4                                    | 238                        | ABCA2,ABCA3,ABR,ADCY1,ADCY3,ADD2,ADRBK1,AEBP1,A   | 7                                          | AUTS2,FIGN,RARB,RCAN2                                     | 0.01993            | +139% |
| cluster5                                    | 377                        | AACS,ABTB1,ADAMTS1,ADAMTS3,ADAMTS9,ADCK2,ADRB     | 9                                          | ADCY3,CBLN1,FOXO3,NAV1,NCAM1,SBK1,SYT13                   | 0.02986            | +97%  |
| cluster6                                    | 183                        | ABCB7,ABCF2,ACBD3,ACSL3,ACVR1,ADAMTSL1,ADSSL1,AL  | 3                                          | CPNE4,PPARG,SOX5,ALPK1,COL16A1,ELAVL4,LRP1B,NLGN1,NFIX    | 0.34900            |       |
| cluster7                                    | 82                         | BCAT1,BOC,C1orf106,CCND1,CD200R1,CDKN1C,CNGA3,Cf  | 2                                          | KAT8,PDXDC1,VEGFA                                         | 0.24135            |       |
| cluster8                                    | 126                        | ADCY1,ADORA1,AKR1C3,ANGPTL4,ANKS1B,AP1G2,APOE,/   | 1                                          | PCSK1,TFAP2B                                              | 0.76665            |       |
| cluster9                                    | 208                        | ACADM,AKR1B1,ALDH7A1,ALG6,ALG8,TMEM237,ANGPT1     | 0                                          | CDH13                                                     | 1.00000            |       |
| cluster10                                   | 407                        | ABL1,ACACA,ACTB,ACTN1,ACVR1B,ADAR,ADCK1,ADCY9,A   | 7                                          | CSNK1G2,FOXO3,MAP2K5,SSBP3,ZC3H4,ZNF536,ZNF608            | 0.18641            |       |
| cluster11                                   | 392                        | ACN9,ACTG2,ACYP2,ADK,AGA,AIM2,AKAP14,AKAP7,ALG1-  | 3                                          | GRP,MTIF3,PTPN2                                           | 0.82952            |       |
| cluster12                                   | 138                        | ADM,ALPL,ANLN,ARL4A,ARRDC3,AURKA,AURKB,BAIAP2L1   | 2                                          | SPAG16,TMEM38B                                            | 0.47009            |       |
